# Supplementary material for: A general and flexible method for signal extraction from single-cell RNA-seq data
Source: PubMed Central journal article supplement (PMC5773593; doi:10.1038/s41467-017-02554-5), 2018-01-18
Supplement: 41467_2017_2554_MOESM1_ESM.pdf [file 41467_2017_2554_MOESM1_ESM.pdf]

## Supplementary figures

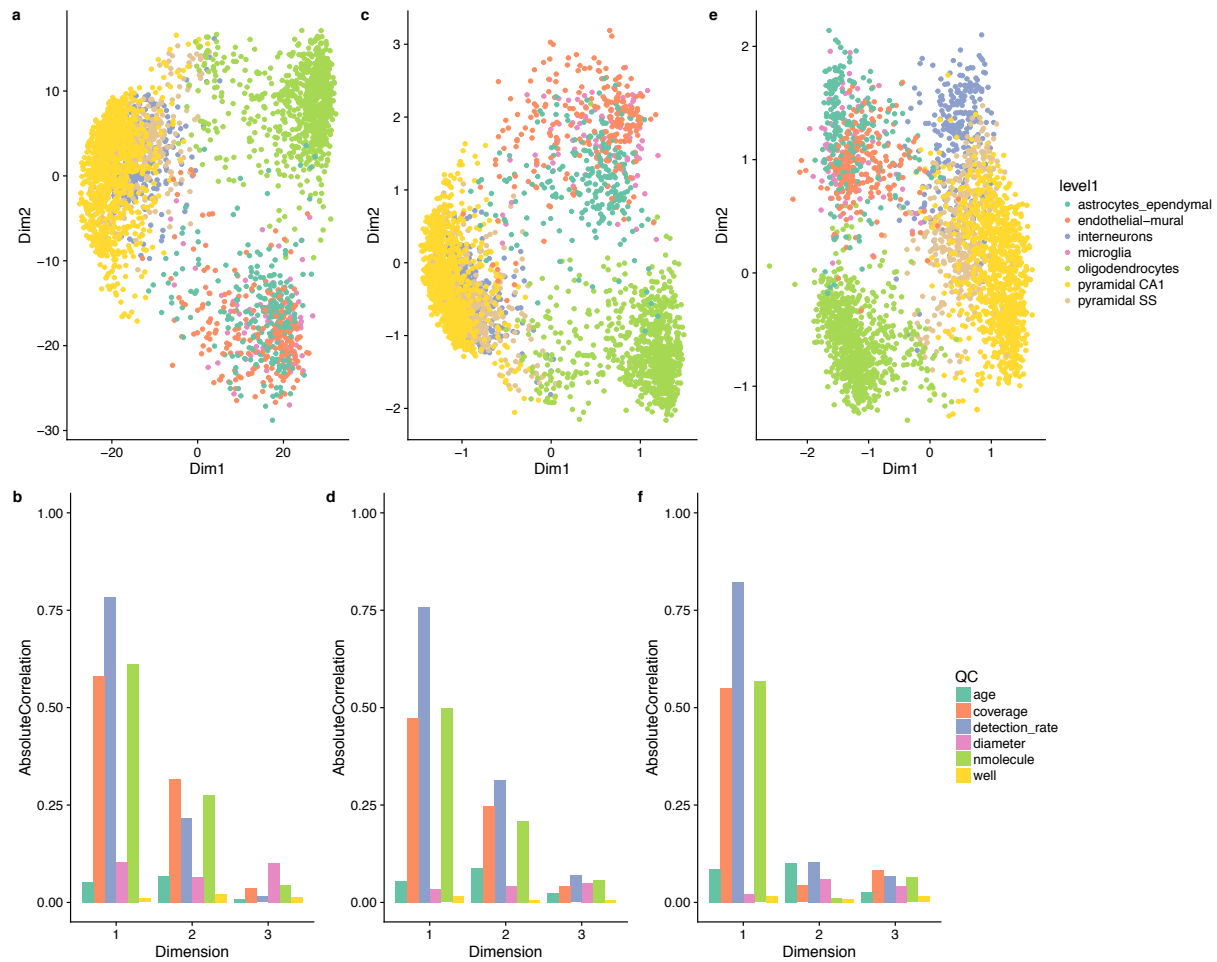

Supplementary Figure 1: *Low-dimensional representation of the S1/CA1 dataset.* Upper panels provide two-dimensional representations of the data. Lower panels provide barplots of the absolute correlation between the first three components and a set of QC measures (see Methods). **(a, b)** PCA (on TC-normalized counts); **(c, d)** ZIFA (on TC-normalized counts); **(e, f)** ZINB-WaVE (no normalization needed). ZINB-WaVE leads to a low-dimensional representation that is less influenced by technical variation and to tighter, biologically meaningful clusters.

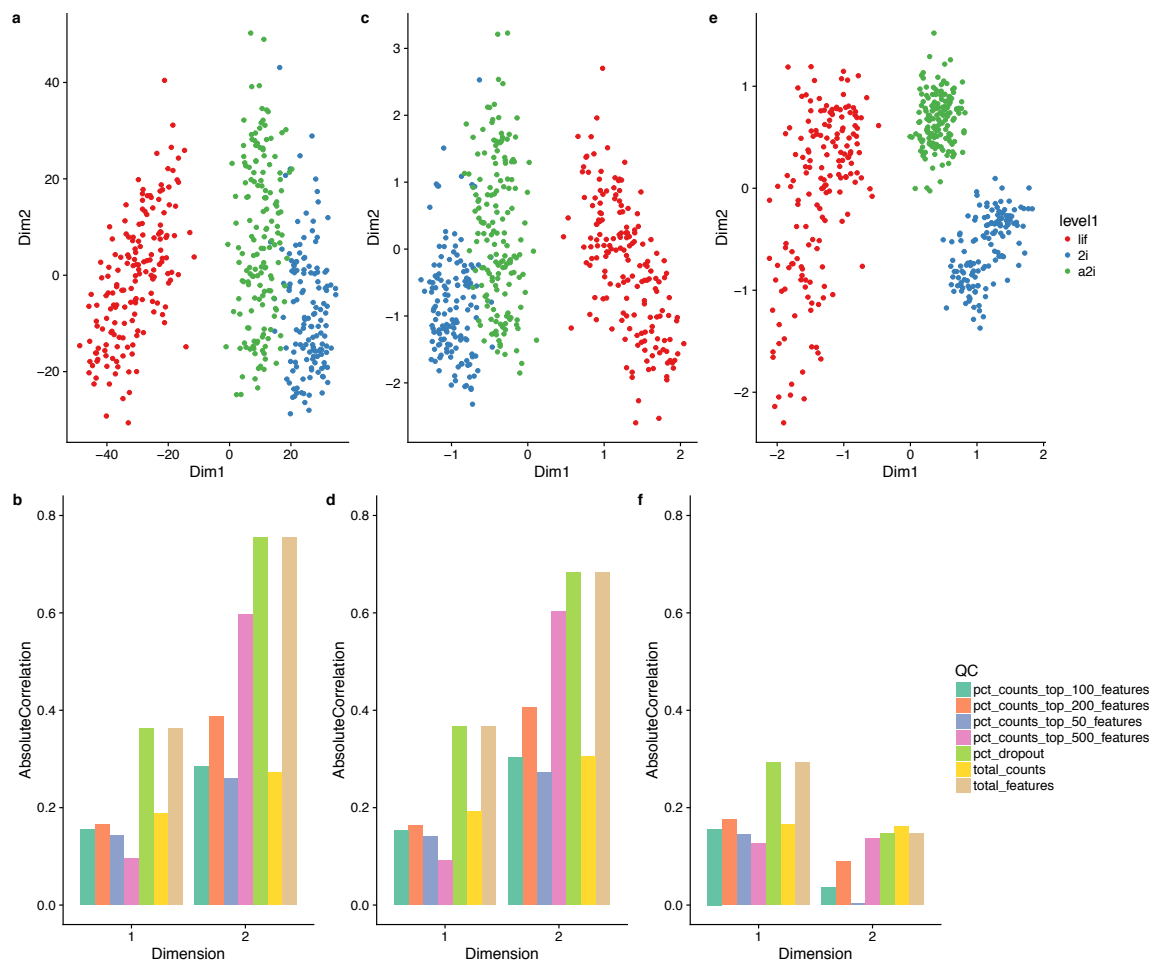

Supplementary Figure 2: *Low-dimensional representation of the mESC dataset.* Upper panels provide two-dimensional representations of the data, after selecting the 1,000 most variable genes. Lower panels provide barplots of the absolute correlation between the first two components and a set of QC measures (see Methods). **(a, b)** PCA (on TC-normalized counts); **(c, d)** ZIFA (on TC-normalized counts); **(e, f)** ZINB-WaVE (no normalization needed). ZINB-WaVE leads to a low-dimensional representation that is less influenced by technical variation and to tighter, biologically meaningful clusters.

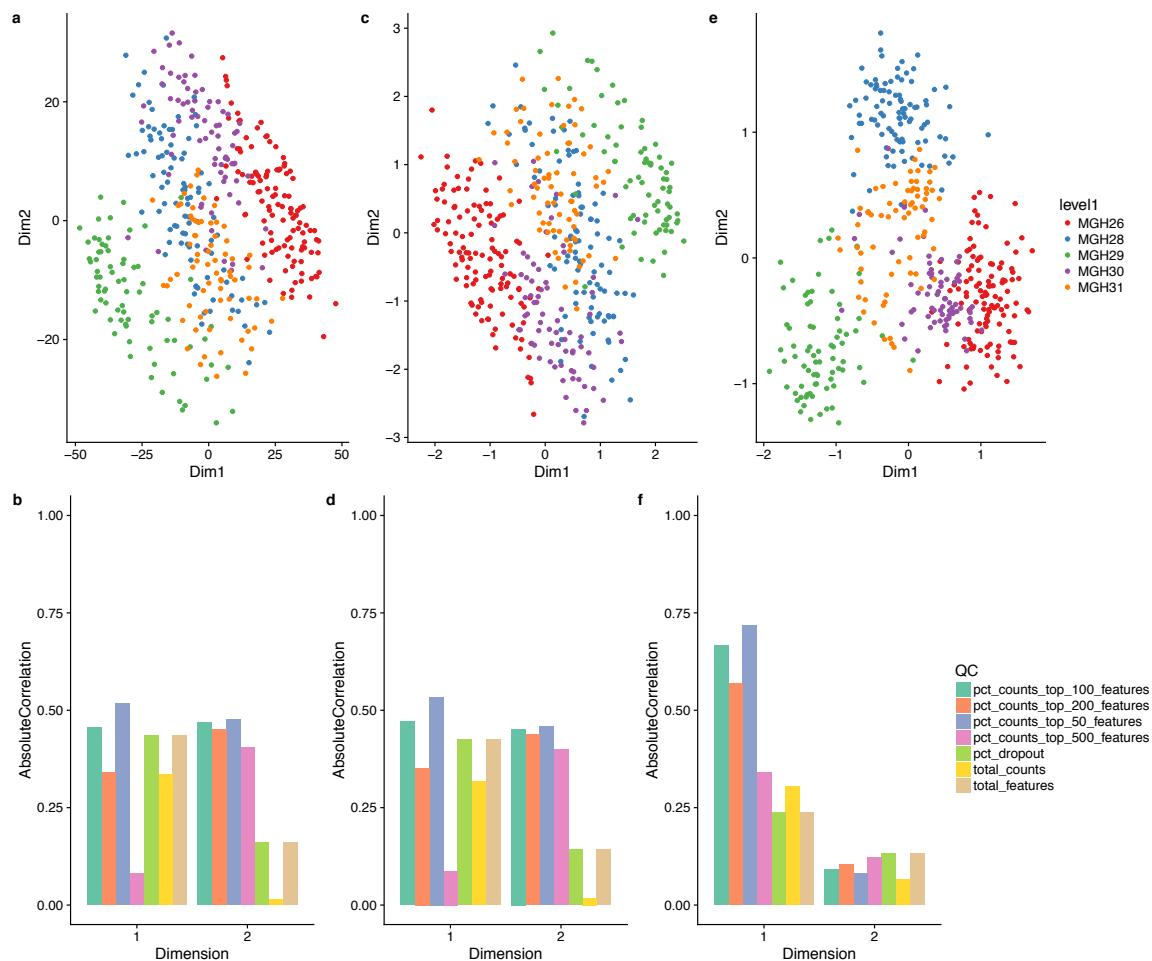

Supplementary Figure 3: *Low-dimensional representation of the Glioblastoma dataset.* Upper panels provide two-dimensional representations of the data, after selecting the 1,000 most variable genes. Lower panels provide barplots of the absolute correlation between the first two components and a set of QC measures (see Methods). **(a, b)** PCA (on TC-normalized counts); **(c, d)** ZIFA (on TC-normalized counts); **(e, f)** ZINB-WaVE (no normalization needed). ZINB-WaVE leads to a low-dimensional representation that is less influenced by technical variation and to tighter, biologically meaningful clusters.

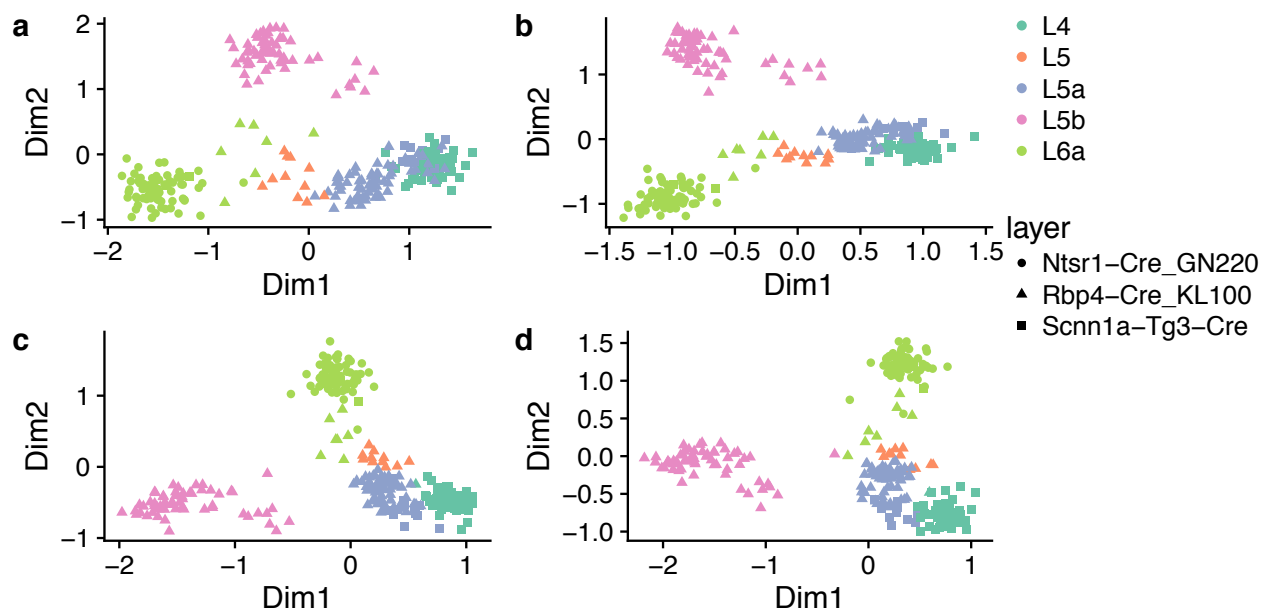

Supplementary Figure 4: *Low-dimensional representation of the V1 dataset.* ZINB-WaVE two-dimensional representation of the data, after selecting the (a) 500, (b) 2,000, (c) 5,000, (d) 10,000 most variable genes. ZINB-WaVE leads to a stable low-dimensional representation, robust to the number of highly variable genes selected.



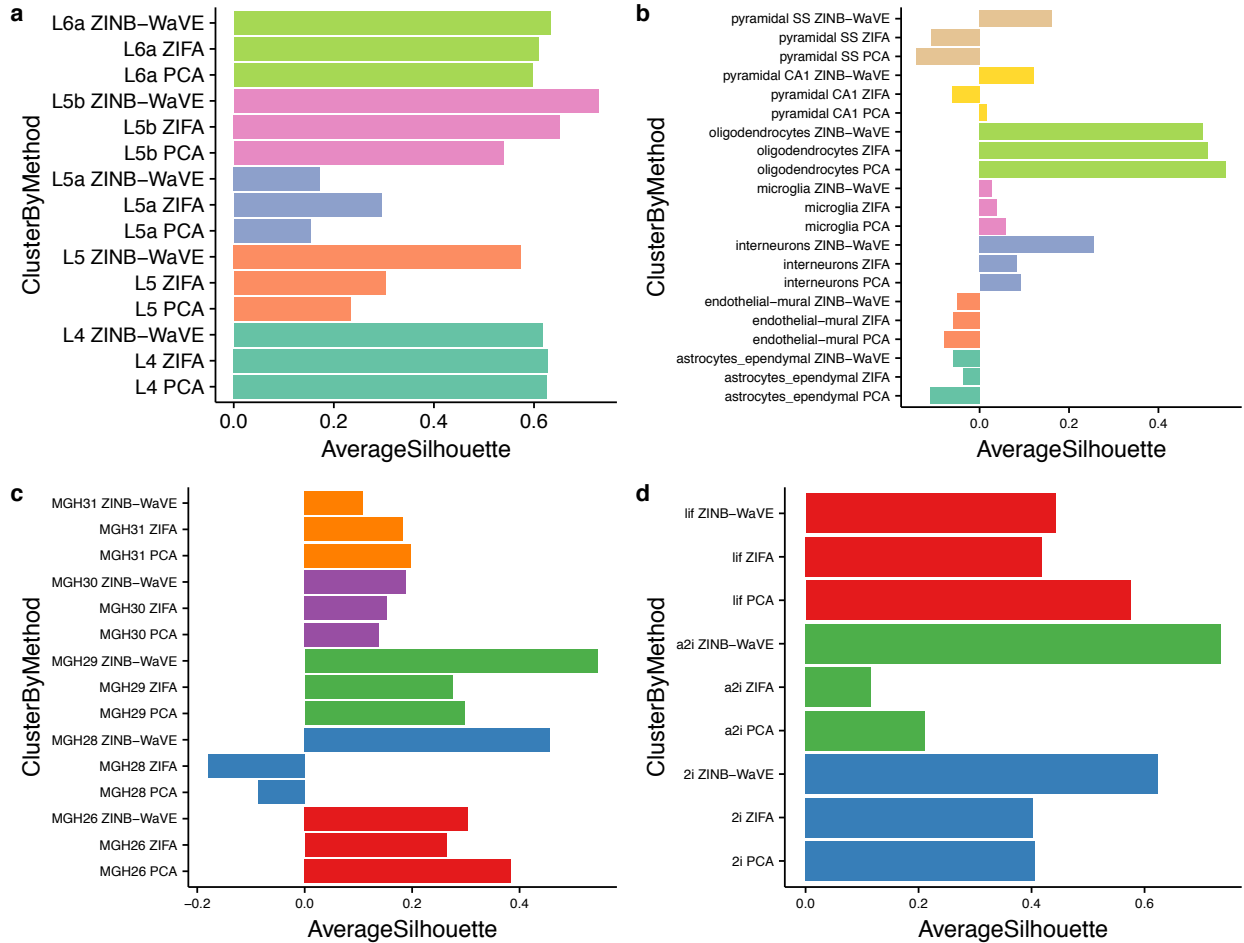

Supplementary Figure 5: *Per-cluster average silhouette widths: Real datasets.* (a) V1 dataset; (b) S1/CA1 dataset; (c) Glioblastoma dataset; (d) mESC dataset. For each of the four scRNA-seq datasets of Figure 2 and Supplementary Figures 1 – 3, barplots of the per-cluster average silhouette widths for ZINB-WaVE, ZIFA, and PCA (the best normalization method was used for ZIFA and PCA). Silhouette widths were computed in the low-dimensional space, using the groupings provided by the authors of the original publications: unsupervised clustering procedure (a–b), observed characteristics of the samples, such as patient (c) and culture condition (d) .

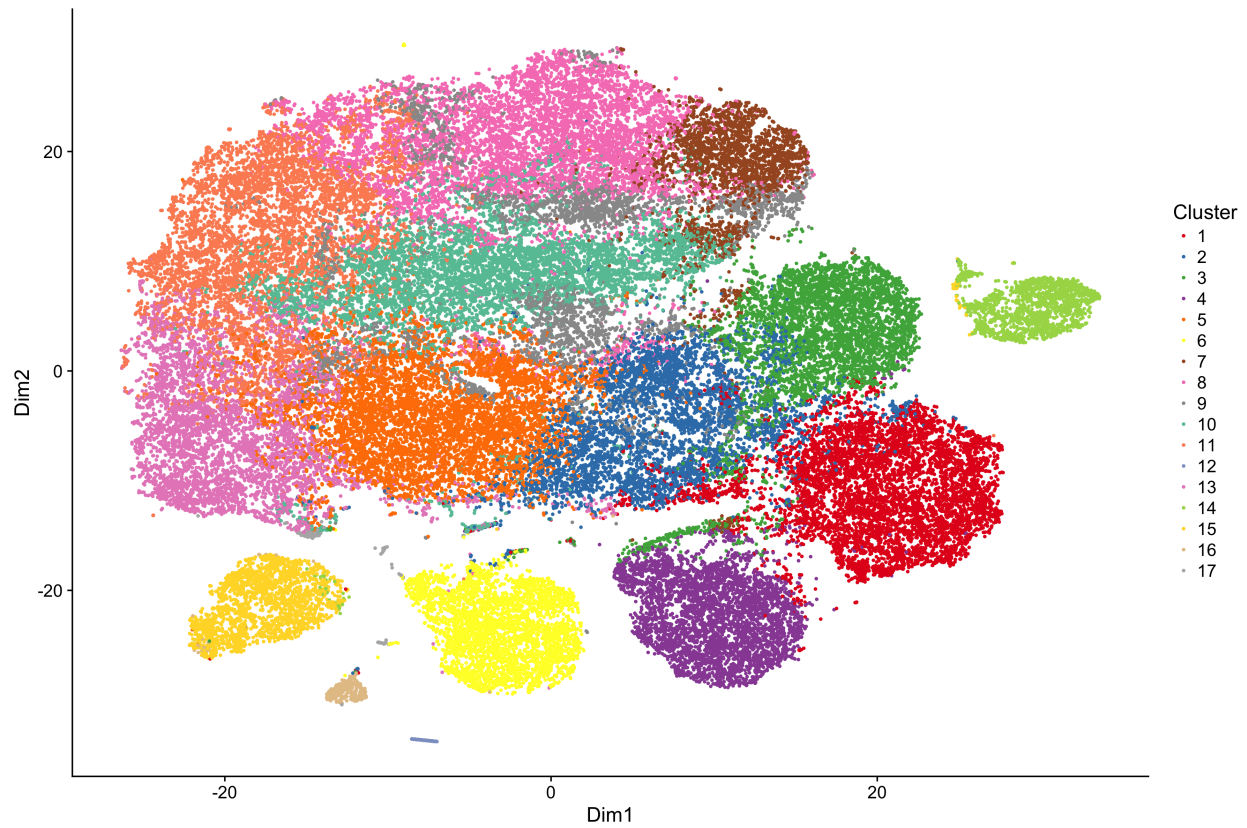

Supplementary Figure 6: *Analysis of the 10x Genomics 68k PBMCs dataset.* Two-dimensional t-SNE representation of  $W$  ( $K = 10$ ) color-coded by sequential  $k$ -means clustering (see Methods for details on the clustering procedure).

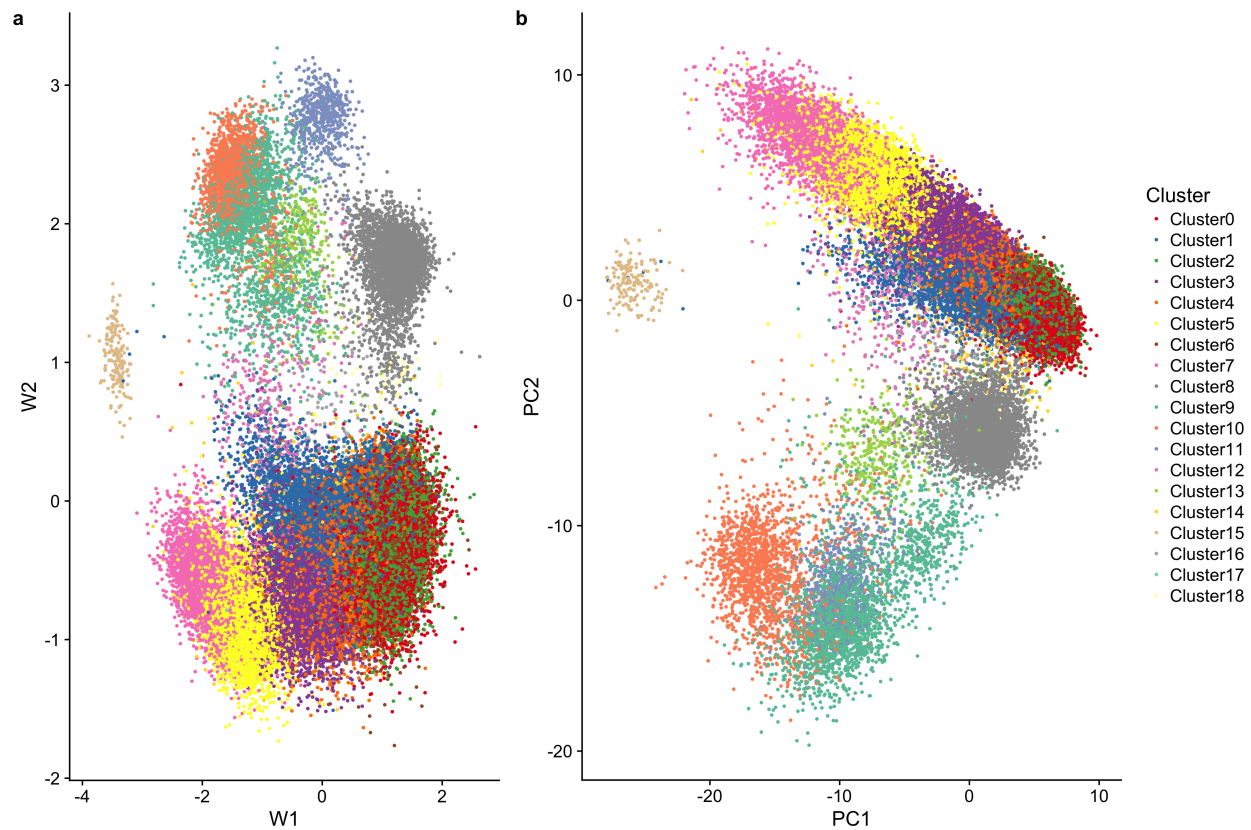

Supplementary Figure 7: *Analysis of the 10x Genomics 68k PBMCs dataset.* **(a)** Two-dimensional signal inferred using ZINB-WaVE. **(b)** First two principal components. Cells are color-coded by sequential  $k$ -means clustering (see Methods for details on the clustering procedure).

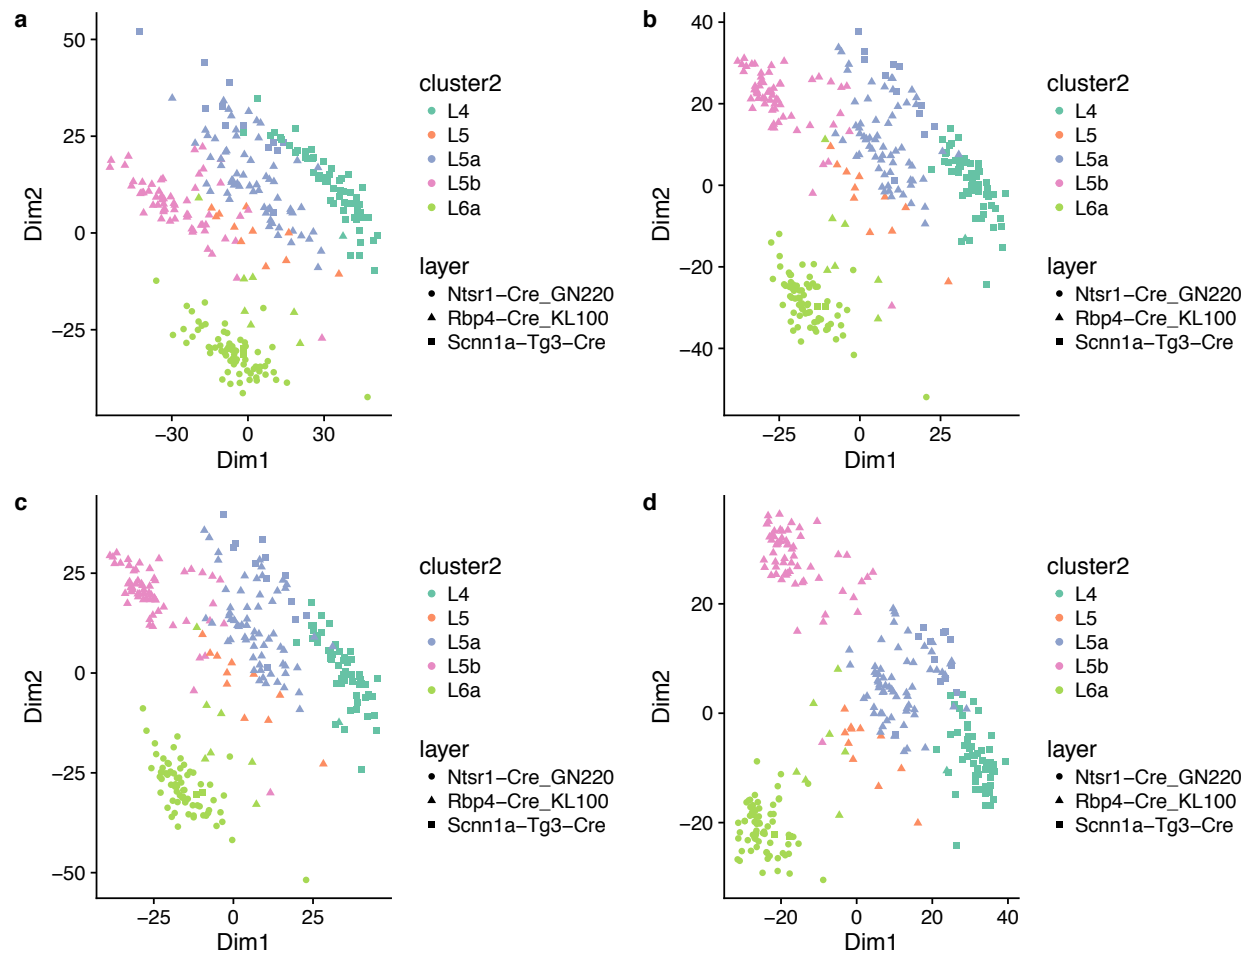

Supplementary Figure 8: *Principal component analysis for V1 dataset.* (a) No normalization; (b) TC normalization; (c) TMM normalization; (d) FQ normalization.

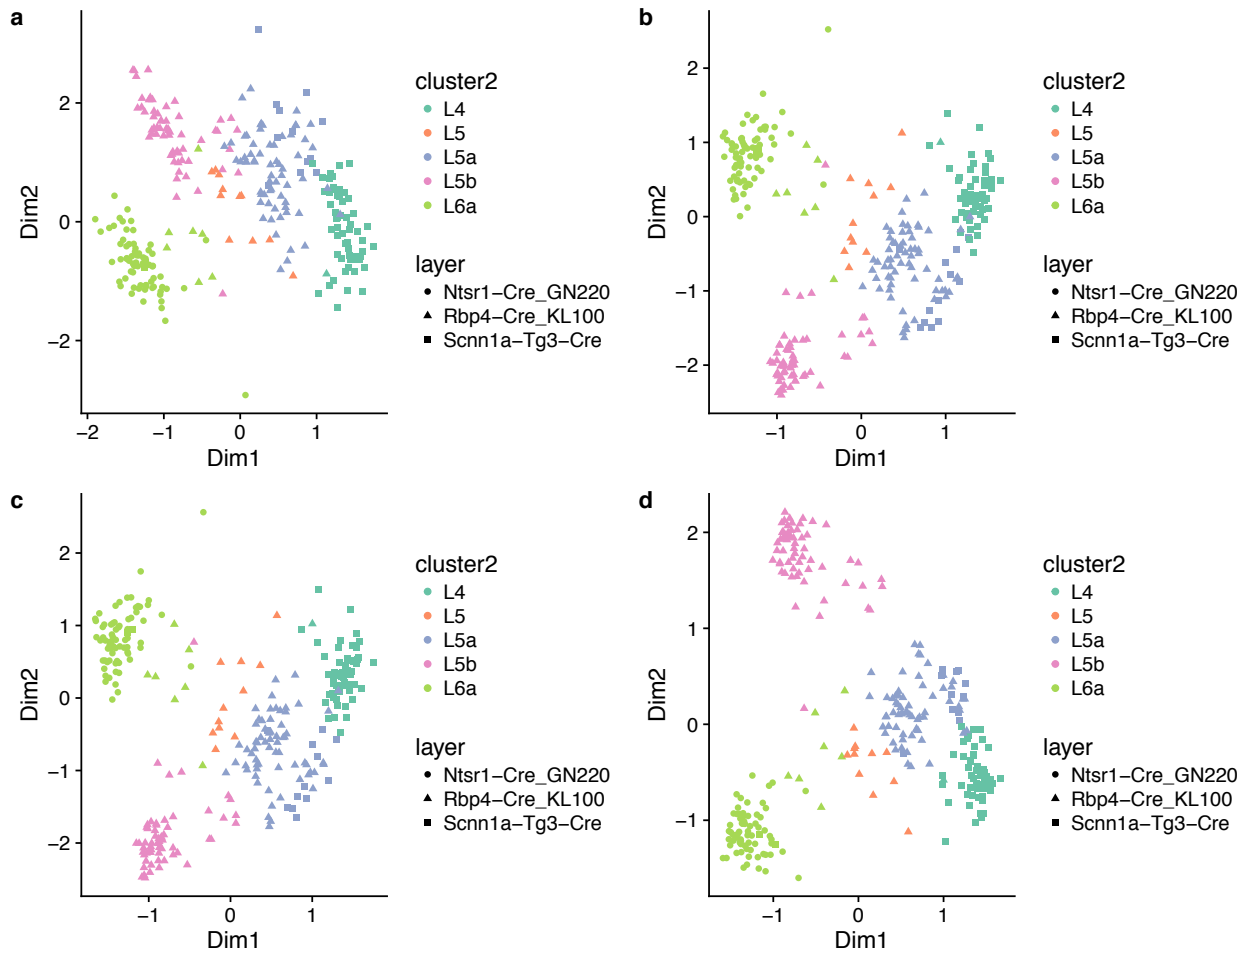

Supplementary Figure 9: *Zero-inflated factor analysis for V1 dataset.* (a) No normalization; (b) TC normalization; (c) TMM normalization; (d) FQ normalization.

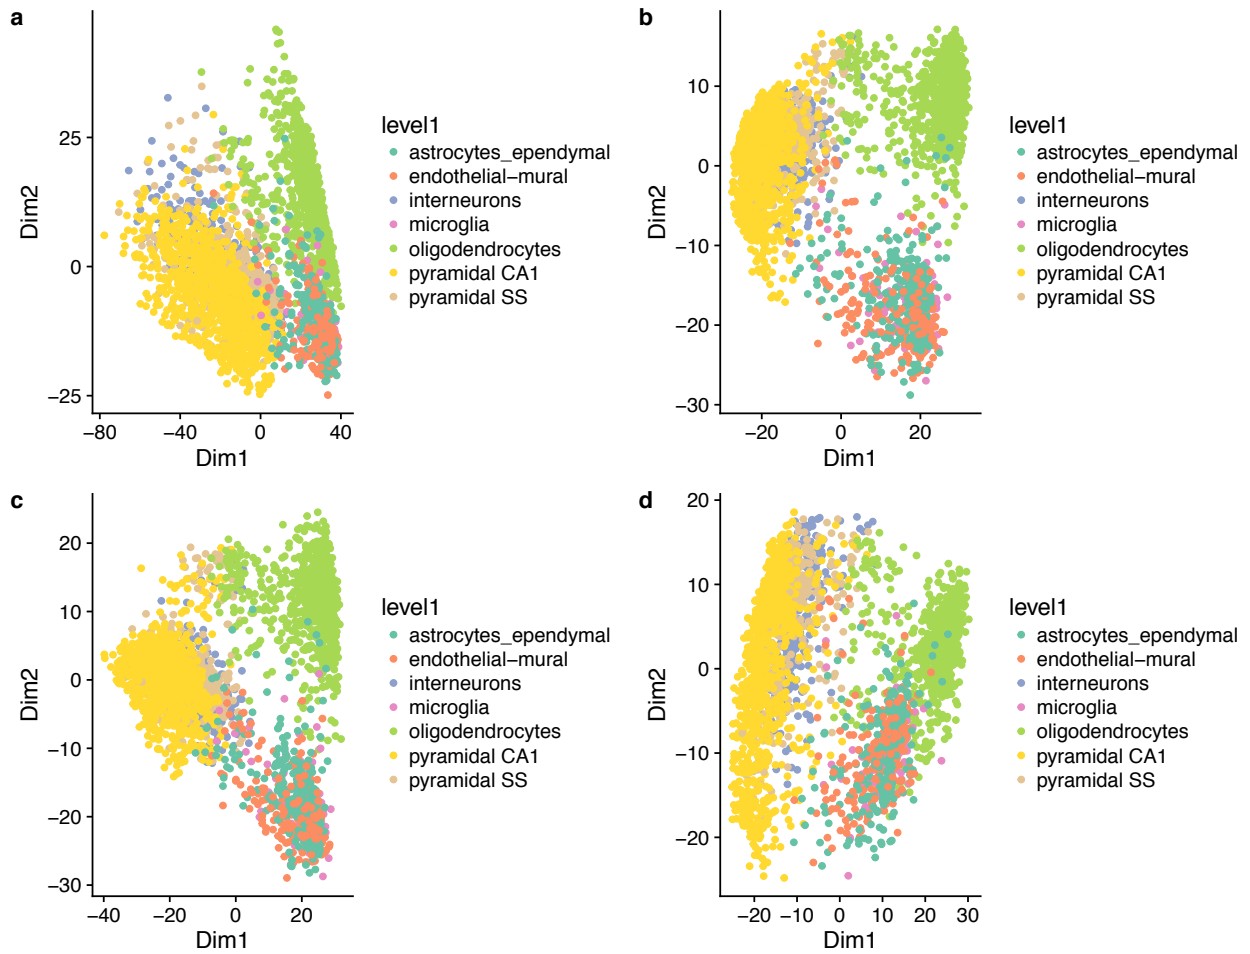

Supplementary Figure 10: *Principal component analysis for S1/CA1 dataset.* (a) No normalization; (b) TC normalization; (c) TMM normalization; (d) FQ normalization.

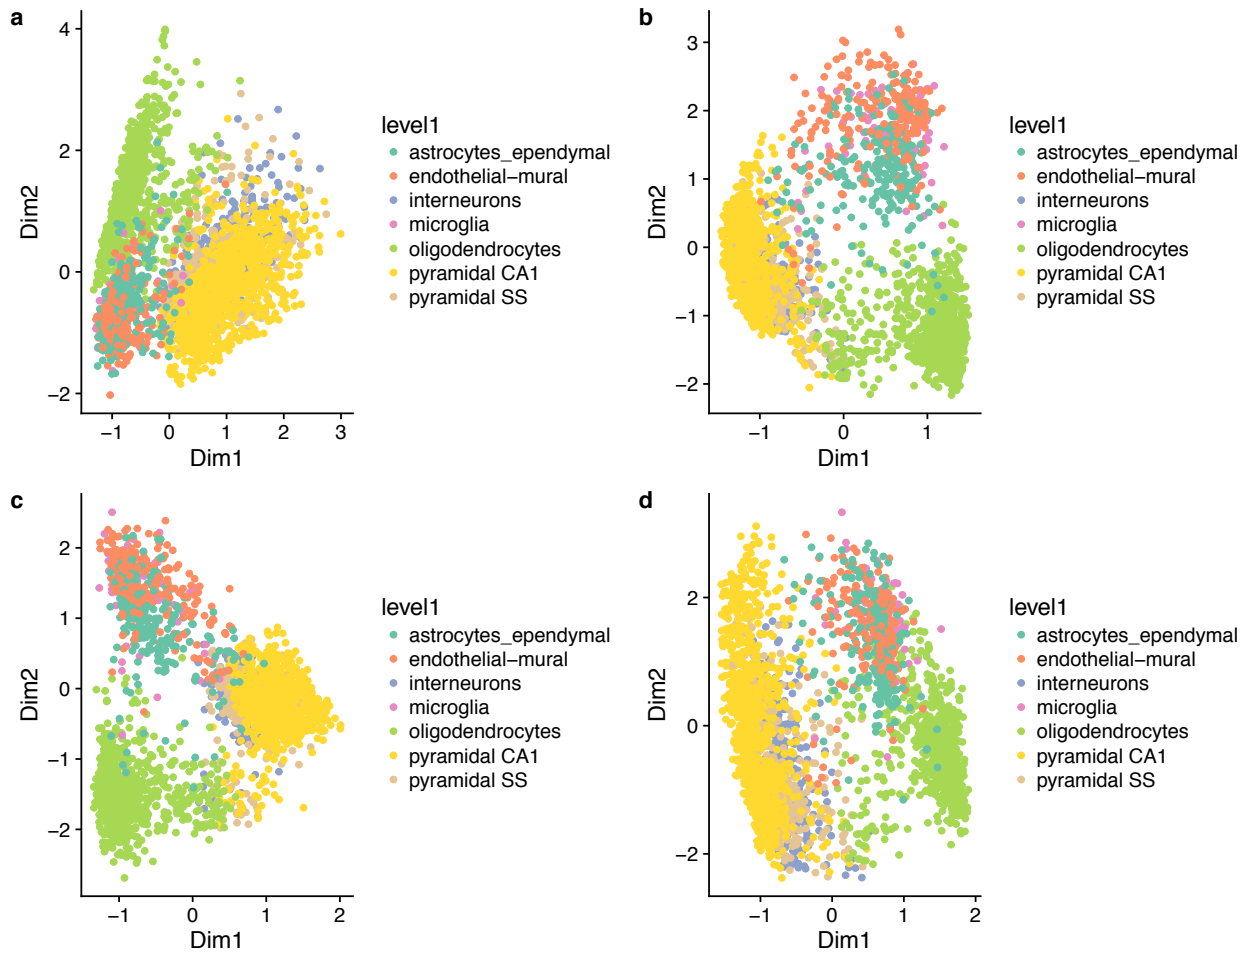

Supplementary Figure 11: *Zero-inflated factor analysis for S1/CA1 dataset.* (a) No normalization; (b) TC normalization; (c) TMM normalization; (d) FQ normalization.

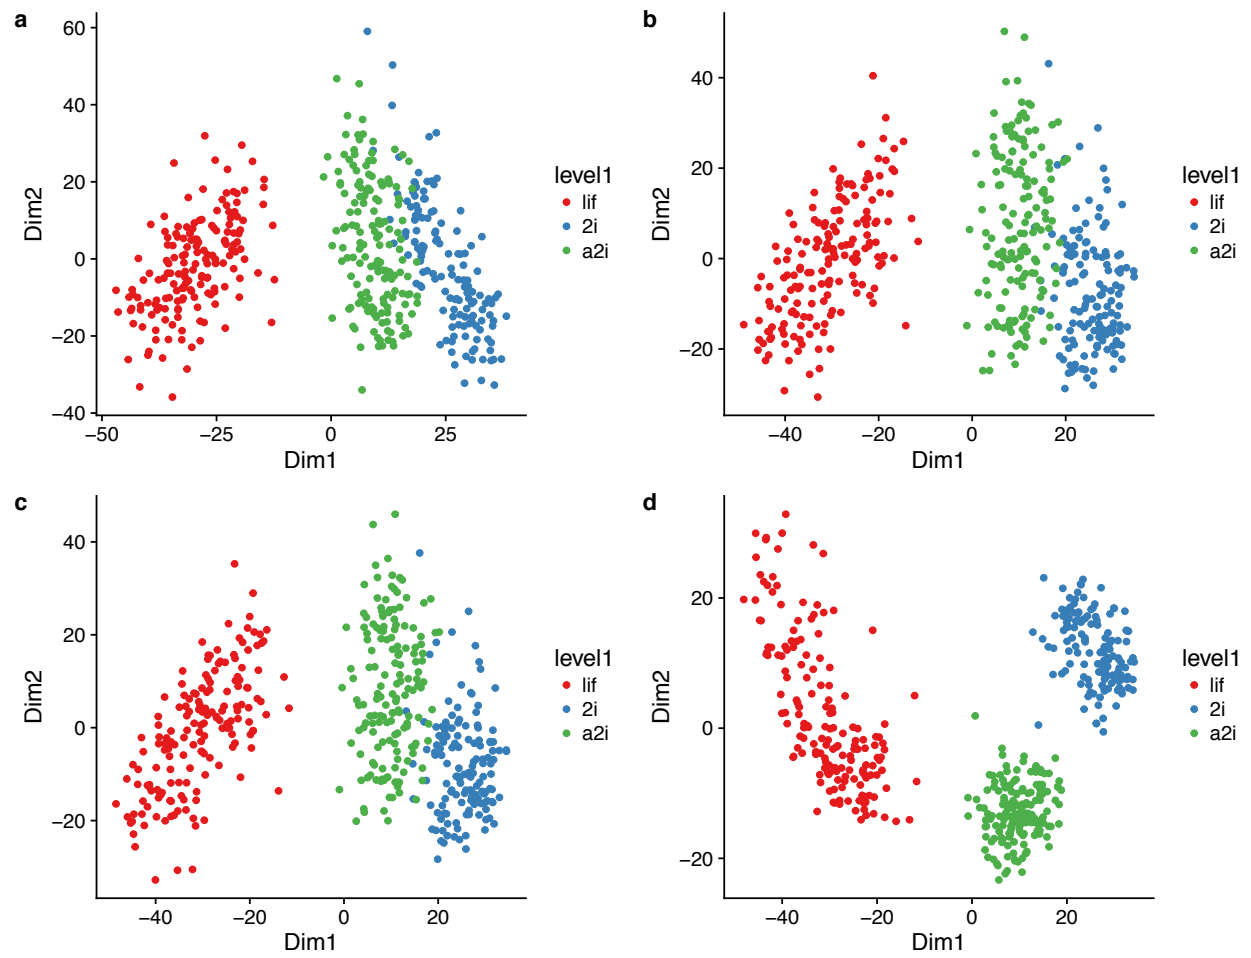

Supplementary Figure 12: *Principal component analysis for mESC dataset. (a) No normalization; (b) TC normalization; (c) TMM normalization; (d) FQ normalization.*



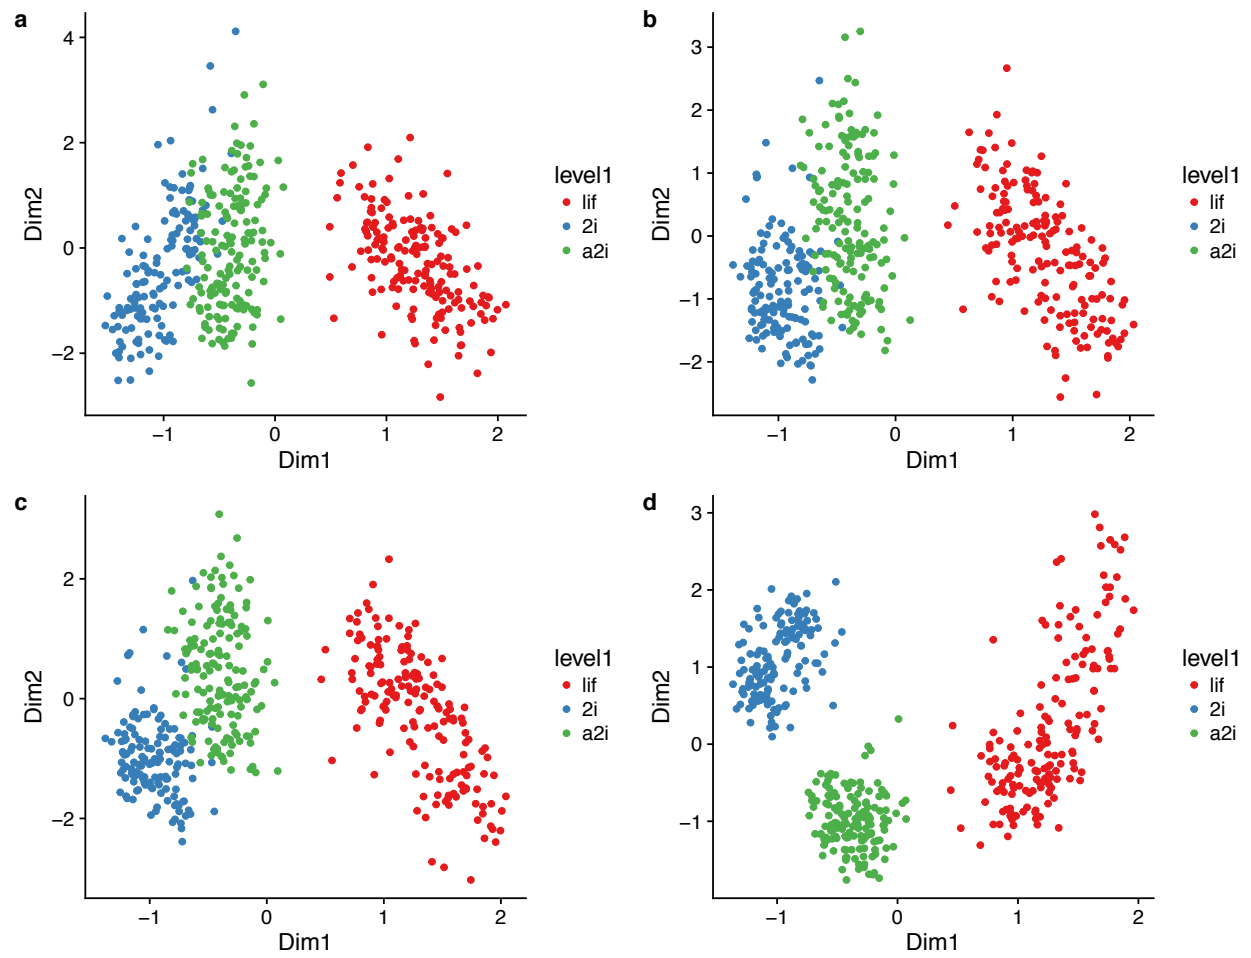

Supplementary Figure 13: *Zero-inflated factor analysis for mESC dataset.* (a) No normalization; (b) TC normalization; (c) TMM normalization; (d) FQ normalization.

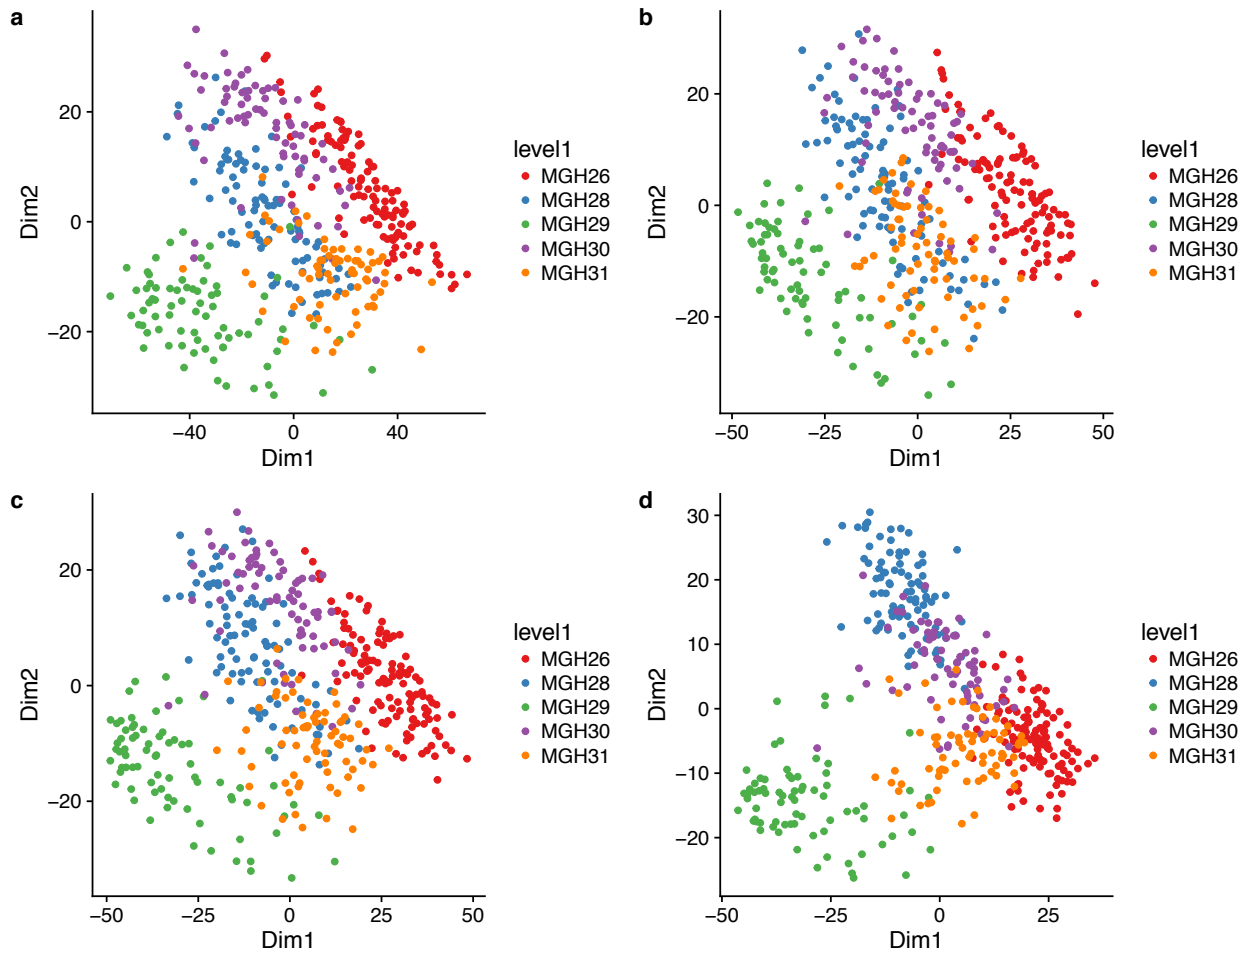

Supplementary Figure 14: *Principal component analysis for Glioblastoma dataset.* (a) No normalization; (b) TC normalization; (c) TMM normalization; (d) FQ normalization.

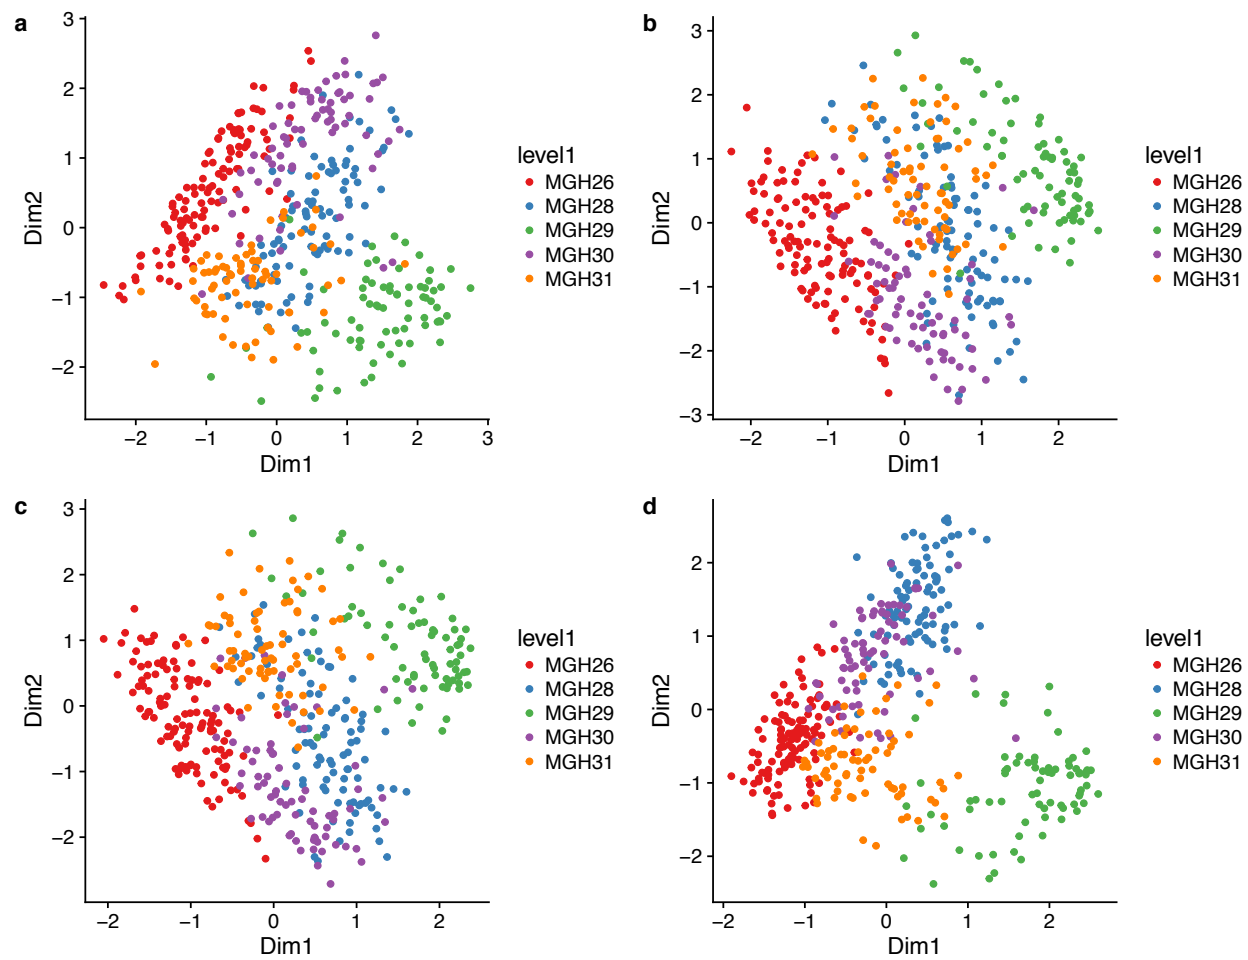

Supplementary Figure 15: *Zero-inflated factor analysis for Glioblastoma dataset.* (a) No normalization; (b) TC normalization; (c) TMM normalization; (d) FQ normalization.

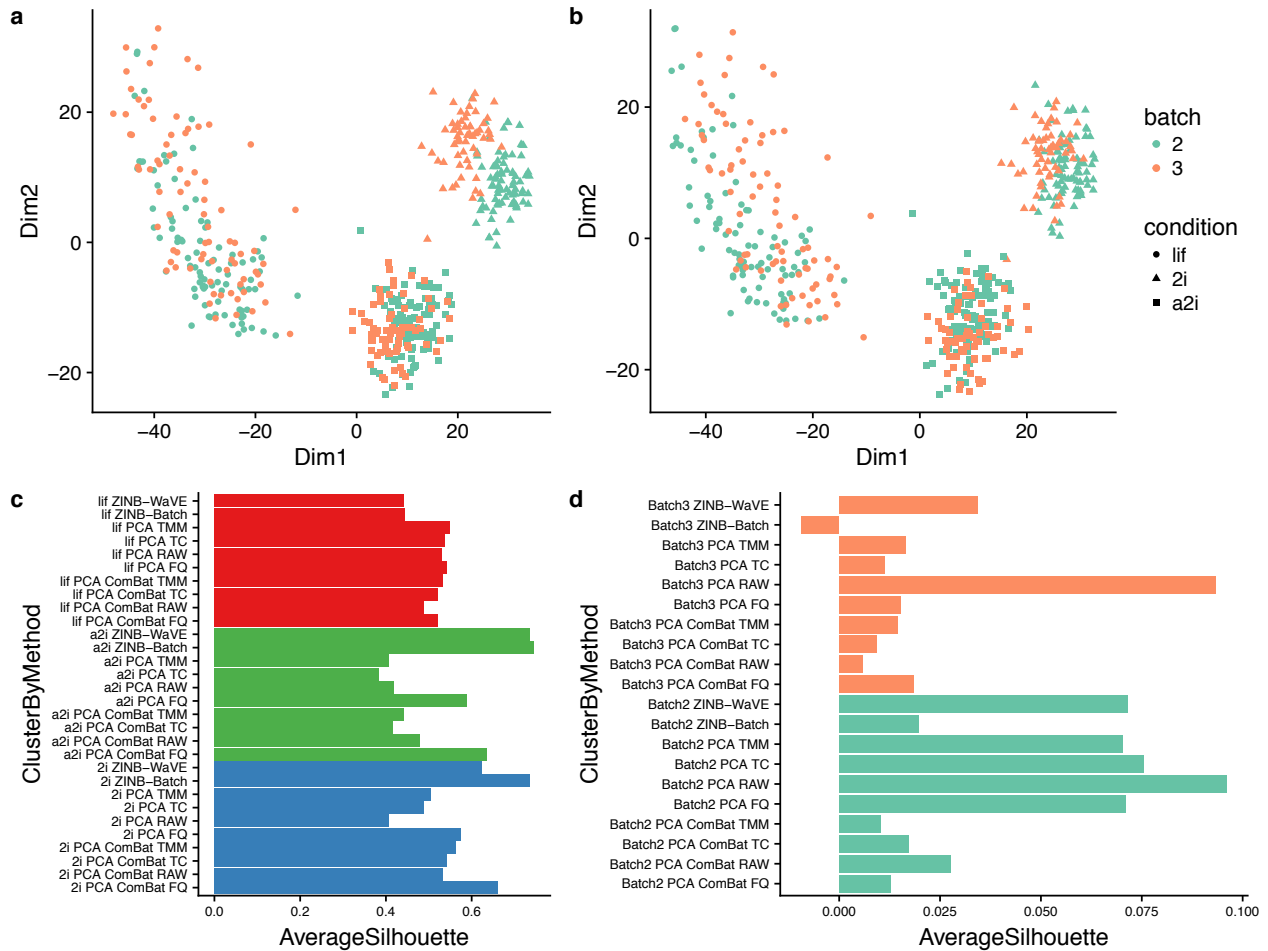

Supplementary Figure 16: *ZINB-Wave* and *ComBat*: *mESC* dataset. Upper panels provide two-dimensional representations of the data, with cells color-coded by batch and shape reflecting culture conditions: **(a)** PCA on FQ-normalized counts; **(b)** PCA on ComBat-normalized counts. **(c)** Average silhouette widths by biological condition for ZINB-WaVE with and without batch covariate, PCA with and without applying ComBat on raw counts and TC, TMM, and FQ-normalized counts; **(d)** Average silhouette widths by batch for ZINB-WaVE with and without batch covariate, PCA with and without applying ComBat on raw counts and TC, TMM, and FQ-normalized counts.

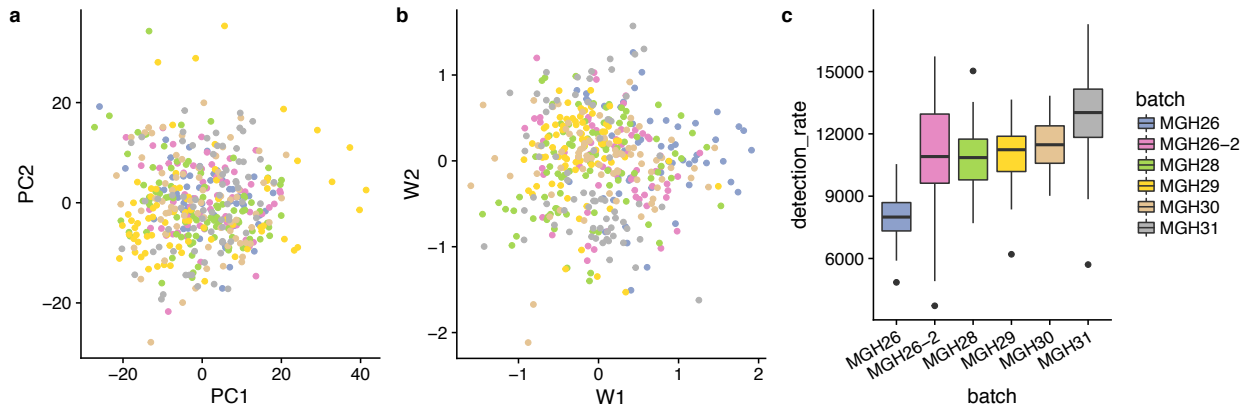

Supplementary Figure 17: *ZINB-Wave and ComBat: Glioblastoma dataset*. (a) PCA on FQ + ComBat-normalized counts; (b) ZINB-WaVE with batch as sample covariate; (c) Boxplot of sample detection rate stratified by batch. Sample detection rate is defined as the total number of genes with at least one read in a given sample.

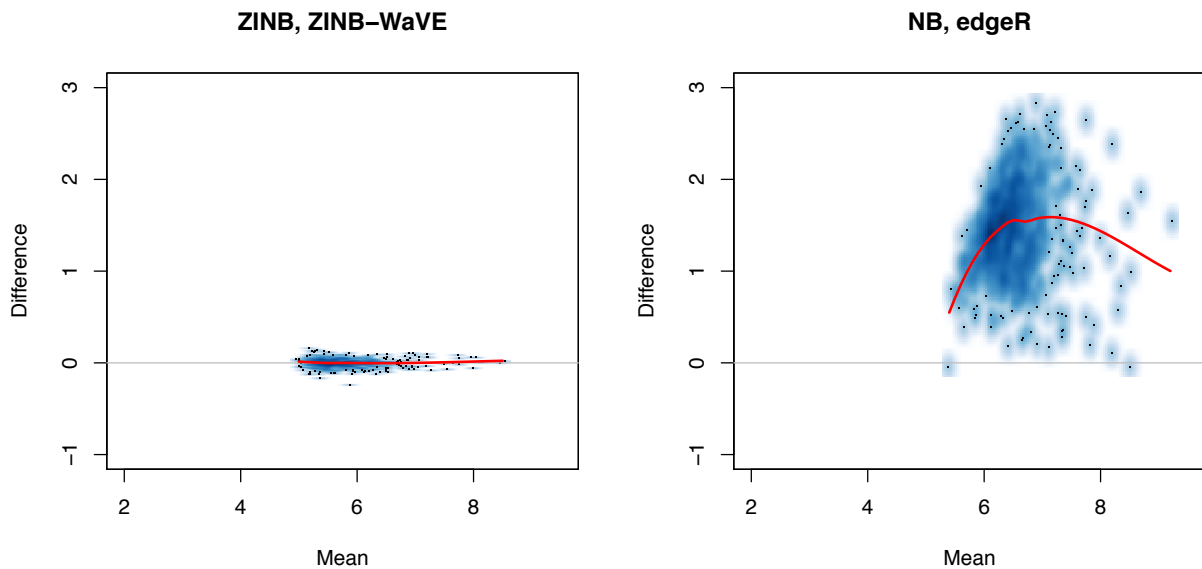

Supplementary Figure 18: *Goodness-of-fit of ZINB-WaVE and NB models: Mean-difference plots of estimated vs. observed mean count for V1 dataset*. Left panel: ZINB-WaVE. Right panel: Negative binomial model fit using *edgeR* package. Observed and estimated mean counts were averaged over  $n$  cells. Counts were plotted on a log scale. See Methods for details.

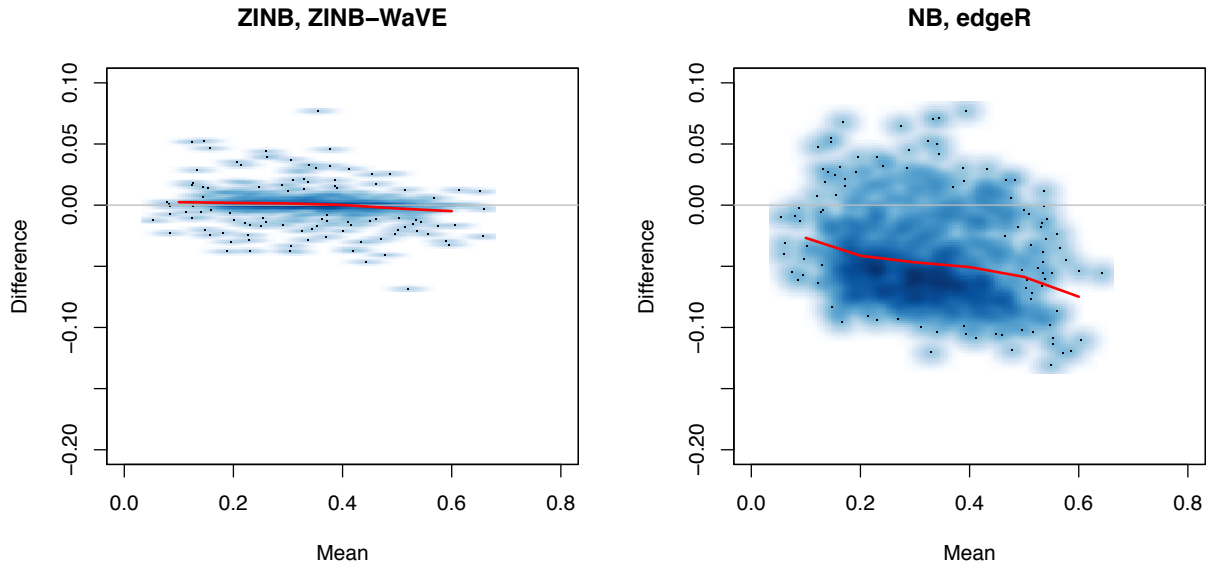

Supplementary Figure 19: *Goodness-of-fit of ZINB-WaVE and NB models: Mean-difference plots of estimated vs. observed zero probability for V1 dataset.* Left panel: ZINB-WaVE. Right panel: Negative binomial model fit using edgeR package. Observed and estimated zero probabilities were averaged over  $n$  cells. See Methods for details.

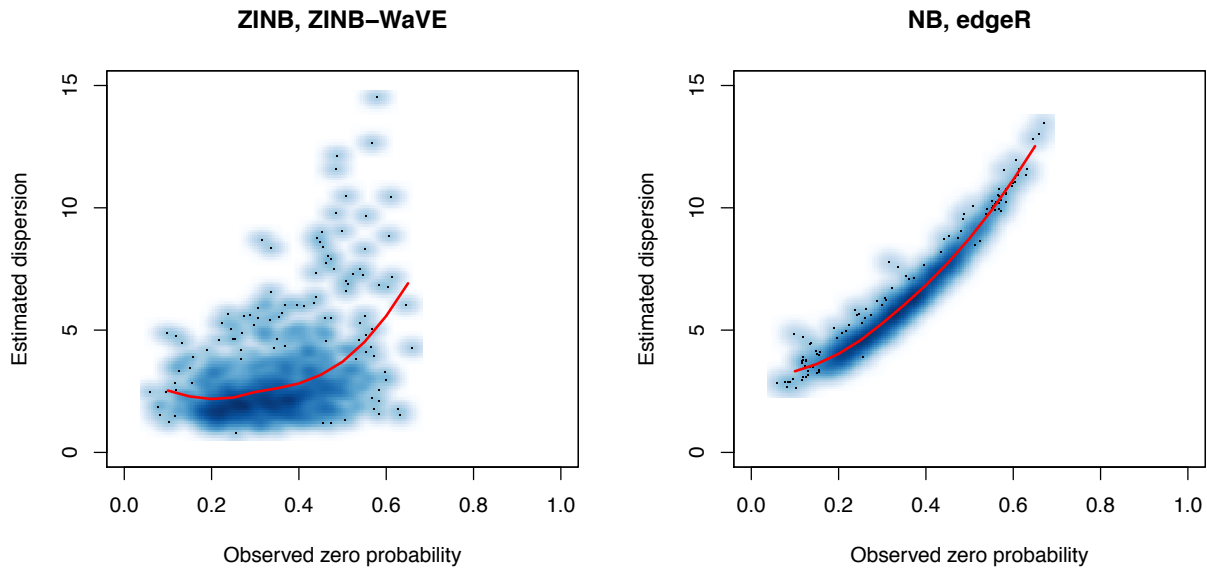

Supplementary Figure 20: *Goodness-of-fit of ZINB-WaVE and NB models: Estimated dispersion parameter vs. observed proportion of zero counts for V1 dataset.* Left panel: Genewise dispersion parameters  $\phi_j$  estimated using ZINB-WaVE. Right panel: Genewise dispersion parameters  $\phi_j$  estimated using edgeR package. See Methods for details.

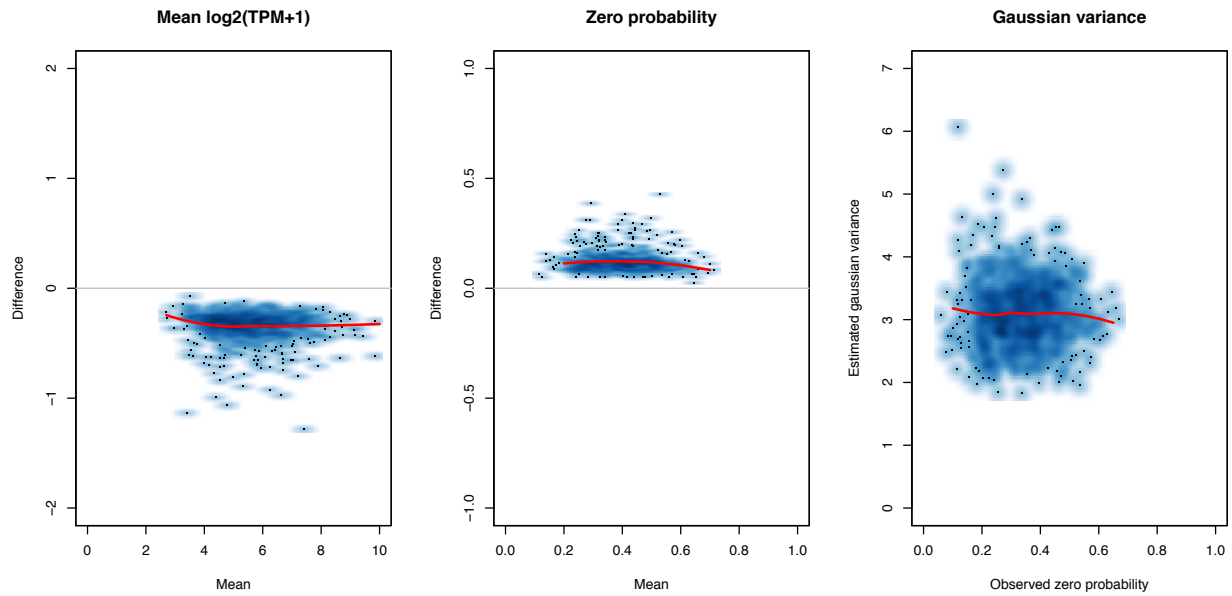

Supplementary Figure 21: *Goodness-of-fit of MAST hurdle model for V1 dataset.* Left panel: Mean-difference plot of estimated vs. observed mean  $\log_2(\text{TPM}+1)$ . Middle panel: Mean-difference plot of estimated vs. observed zero probability. Right panel: Estimated Gaussian variance parameter  $\sigma_j^2$  vs. observed proportion of zero counts. For left and middle panels, observed and estimated mean  $\log_2(\text{TPM}+1)$  and zero probabilities were averaged over  $n$  cells. Parameters were estimated using the function `zlm` from the MAST package, with an intercept and a covariate for the cellular detection rate (as recommended in the MAST vignette for the MAIT data analysis) for both the discrete and continuous parts.

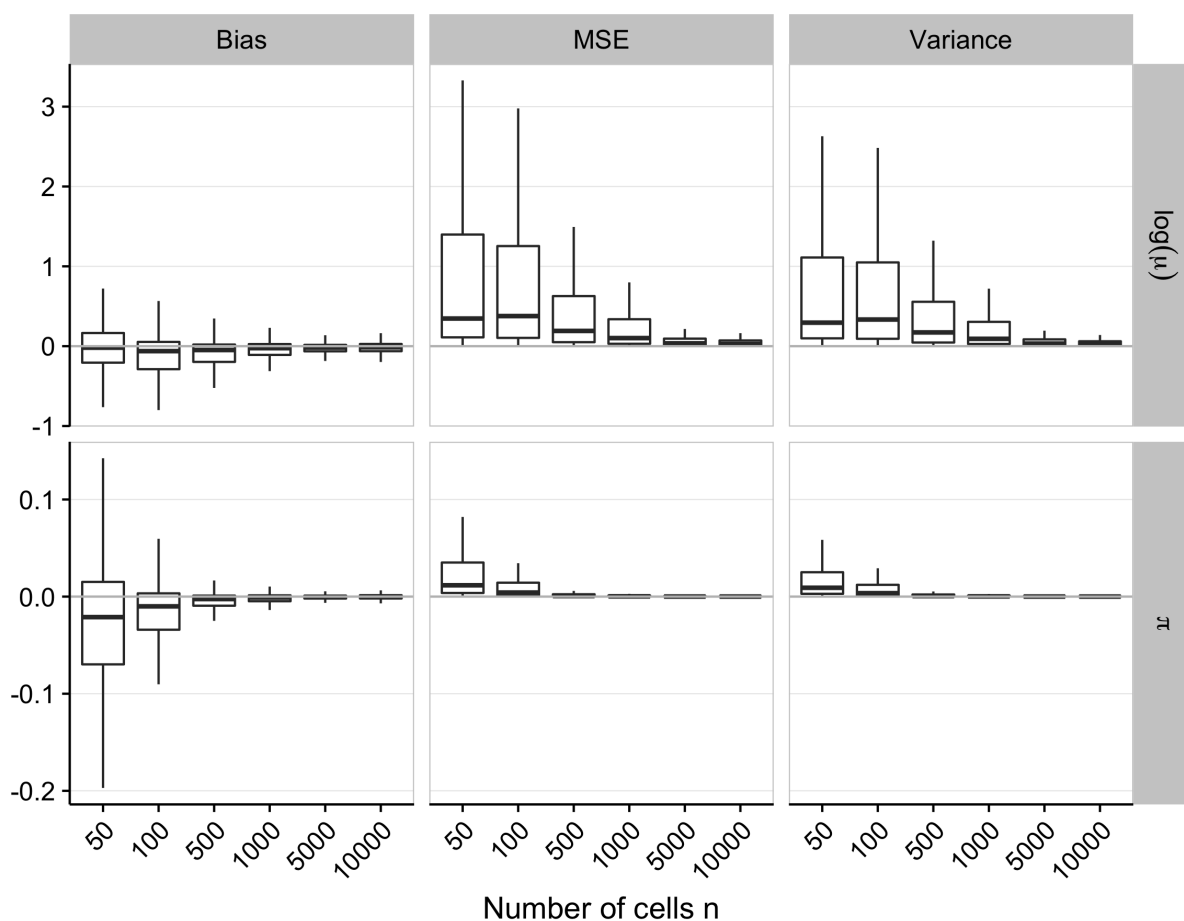

Supplementary Figure 22: *Bias, MSE, and variance for ZINB-WaVE estimation procedure: ZINB-WaVE simulation model.* Boxplots of bias, MSE, and variance for  $\ln(\mu)$  and  $\pi$  as a function of the number of cells  $n$ . For each gene and cell, bias, MSE, and variance were averaged over  $B = 10$  datasets simulated from our ZINB-WaVE model, based on the S1/CA1 dataset and with  $n \in \{50, 100, 500, 1,000, 5,000, 10,000\}$  cells,  $J = 1,000$  genes, scaling of one for the ratio of within to between-cluster sums of squares ( $b^2 = 1$ ), and zero fraction of about 80%. The following values were used for both simulating the data and fitting the ZINB-WaVE model to these data:  $K = 2$  unknown factors,  $X = \mathbf{1}_n$ , cell-level intercept ( $V = \mathbf{1}_J$ ), and gene-wise dispersion.



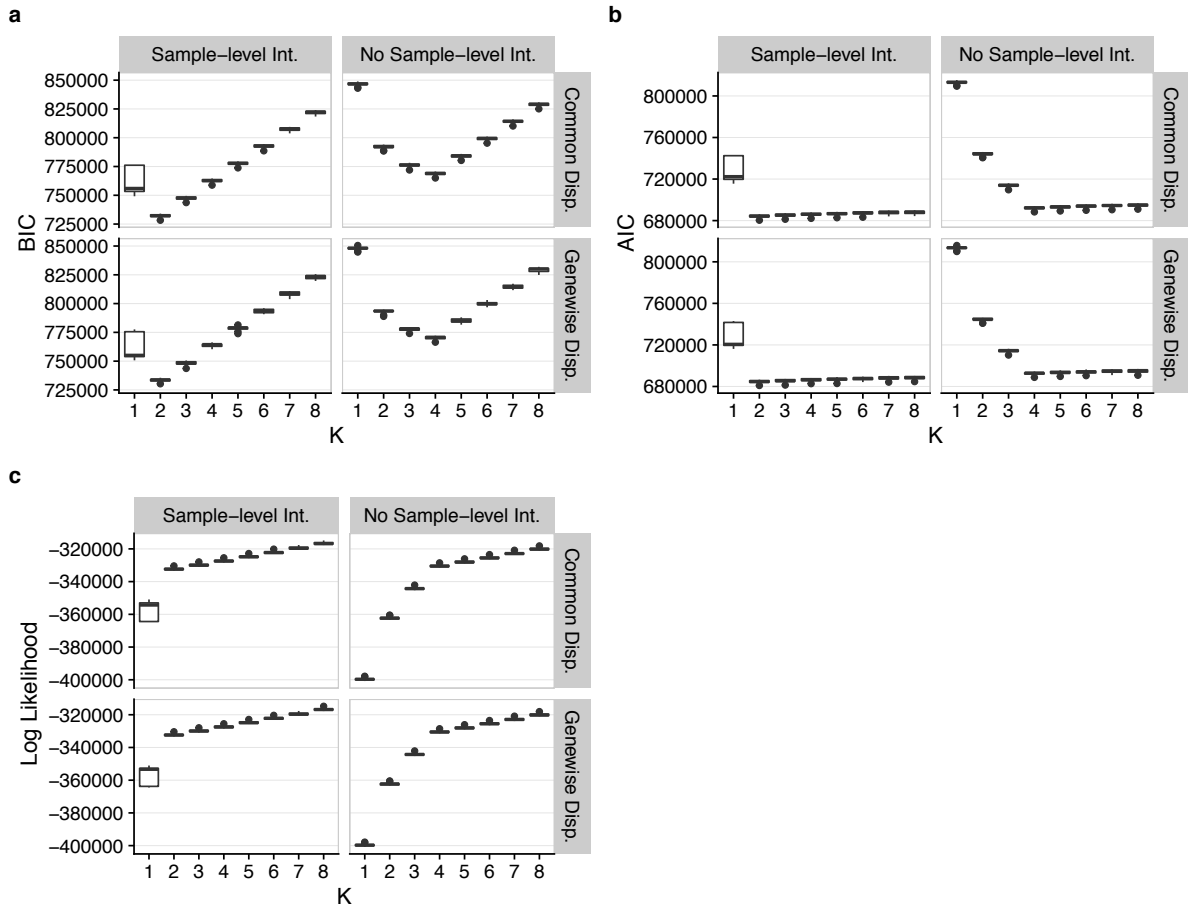

Supplementary Figure 23: *BIC, AIC, and log-likelihood for ZINB-WaVE estimation procedure: ZINB-WaVE simulation model.* Panels show boxplots of (a) BIC, (b) AIC, and (c) log-likelihood for ZINB-WaVE estimation procedure, as a function of the number of unknown covariates  $K$ . ZINB-WaVE was fit with  $X = \mathbf{1}_n$ , common/genewise dispersion, and with/without sample-level intercept (i.e., column of ones in gene-level covariate matrix  $V$ ). For each gene and cell, BIC, AIC, and log-likelihood were averaged over  $B = 10$  datasets simulated from our ZINB-WaVE model, based on the S1/CA1 dataset and with  $n = 1,000$  cells,  $J = 1,000$  genes, scaling of one for the ratio of within to between-cluster sums of squares ( $b^2 = 1$ ),  $K = 2$  unknown factors, zero fraction of about 80%,  $X = \mathbf{1}_n$ , cell-level intercept ( $V = \mathbf{1}_J$ ), and genewise dispersion.

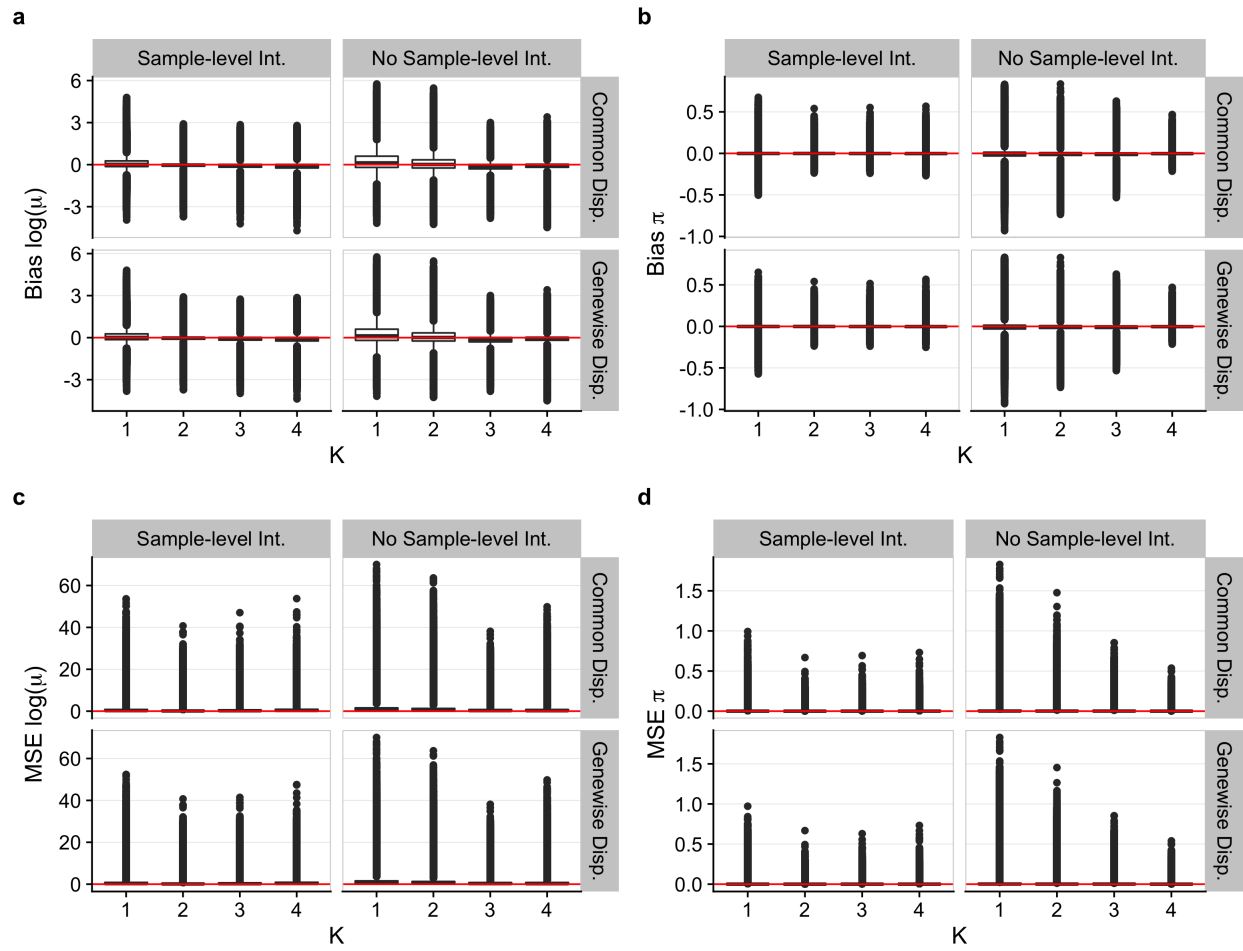

Supplementary Figure 24: *Bias and MSE for ZINB-WaVE estimation procedure: ZINB-WaVE simulation model.* Same as Figure 6, but with outliers plotted individually (i.e., observations beyond the whiskers).

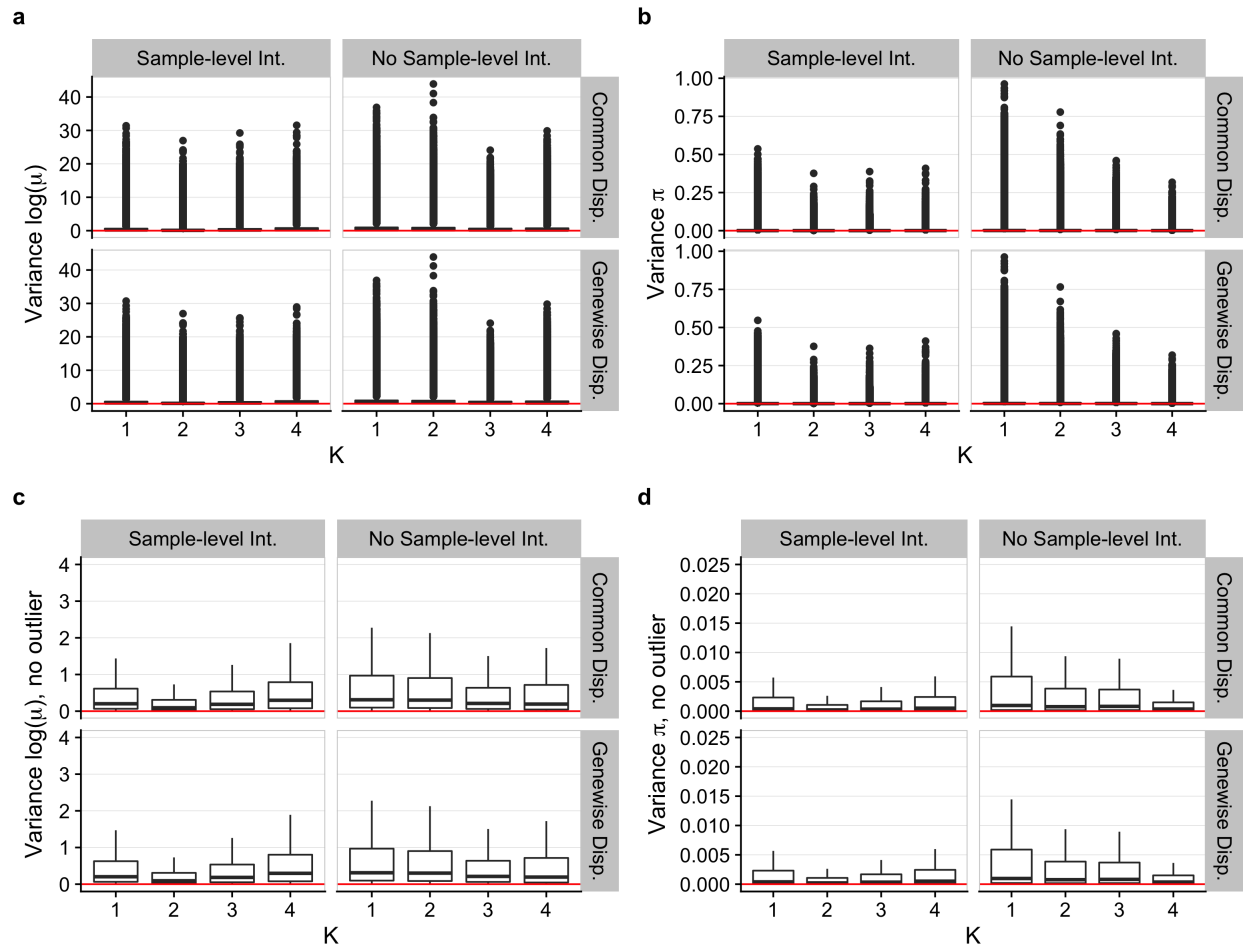

Supplementary Figure 25: Variance for ZINB-WaVE estimation procedure: ZINB-WaVE simulation model. Panels show boxplots of variance (over  $B = 10$  simulated datasets) for estimates of  $\ln(\mu)$  (a, c) and  $\pi$  (b, d). Outliers plotted in (a, b) and omitted in (c, d). Simulation scenario as in Figure 6.

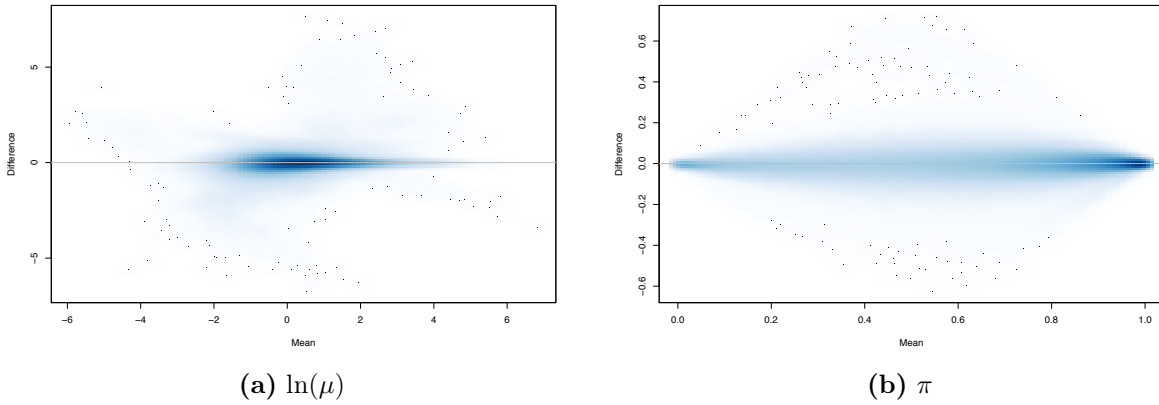

Supplementary Figure 26: *Bias for ZINB-WaVE estimation procedure: ZINB-WaVE simulation model.* **(a)** Mean-difference plot of estimated vs. true negative binomial mean (log scale),  $\ln(\hat{\mu}) - \ln(\mu)$  vs.  $(\ln(\mu) + \ln(\hat{\mu}))/2$ . **(b)** Mean-difference plot of estimated vs. true zero inflation probability,  $\hat{\pi} - \pi$  vs.  $(\pi + \hat{\pi})/2$ . The estimates are based on one of the  $B = 10$  datasets simulated from our ZINB-WaVE model, based on the S1/CA1 dataset and with  $n = 1,000$  cells,  $J = 1,000$  genes, scaling of one for the ratio of within to between-cluster sums of squares ( $b^2 = 1$ ), and zero fraction of about 80%. The following values were used for both simulating the data and fitting the ZINB-WaVE model to these data:  $K = 2$  unknown factors,  $X = \mathbf{1}_n$ , cell-level intercept ( $V = \mathbf{1}_J$ ), and genewise dispersion (as in Fig. 6 and Supplementary Fig. 24 and 25).

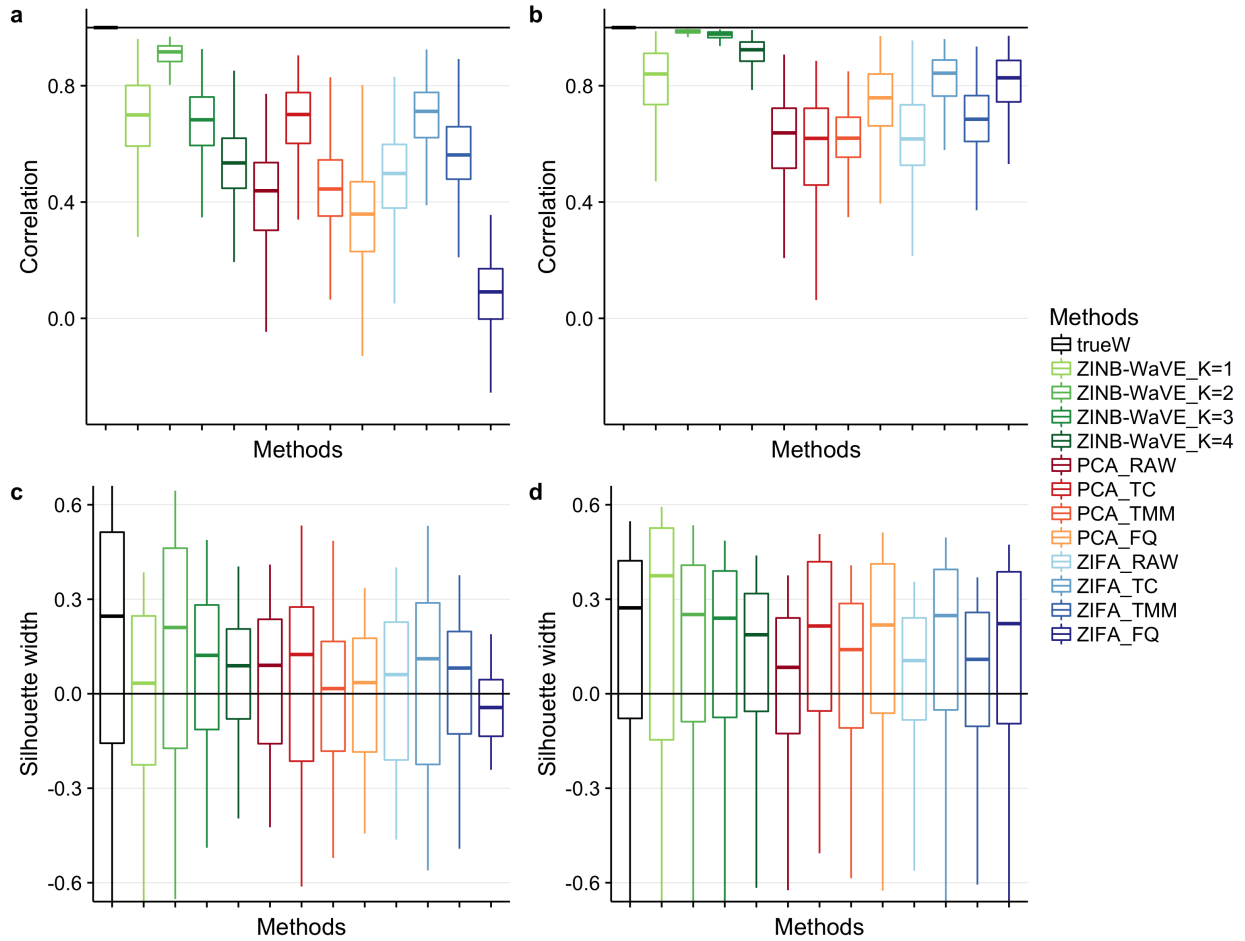

Supplementary Figure 27: *Between-sample distances and silhouette widths for ZINB-WaVE, PCA, and ZIFA: ZINB-WaVE simulation model.* (a) Boxplots of correlations between between-sample distances based on true and estimated low-dimensional representations of the data for simulations based on the V1 dataset. (b) Same as (a) for simulations based on the S1/CA1 dataset. (c) Boxplots of silhouette widths for true clusters for simulations based on the V1 dataset. (d) Same as (c) for simulations based on the S1/CA1 dataset. All datasets were simulated from our ZINB-WaVE model with  $n = 10,000$  cells,  $J = 1,000$  genes, “harder” clustering ( $b^2 = 5$ ),  $K = 2$  unknown factors, zero fraction of about 80%,  $X = \mathbf{1}_n$ , cell-level intercept ( $V = \mathbf{1}_J$ ), and genewise dispersion. Each boxplot is based on  $n$  values corresponding to each of the  $n$  samples and defined as averages of correlations (a, b) or silhouette widths (c, d) over  $B = 10$  simulations. Between-sample distance matrices and silhouette widths were based on  $W$  for ZINB-WaVE, the first two principal components for PCA, and the first two latent variables for ZIFA. ZINB-WaVE was applied with  $X = \mathbf{1}_n$ ,  $V = \mathbf{1}_J$ , genewise dispersion, and  $K \in \{1, 2, 3, 4\}$ . For PCA and ZIFA, different normalization methods were used. Colors correspond to the different methods. See Figure 7a–d for the same scenario but with  $n = 1,000$  cells and Supplementary Figure 28 for additional scenarios.

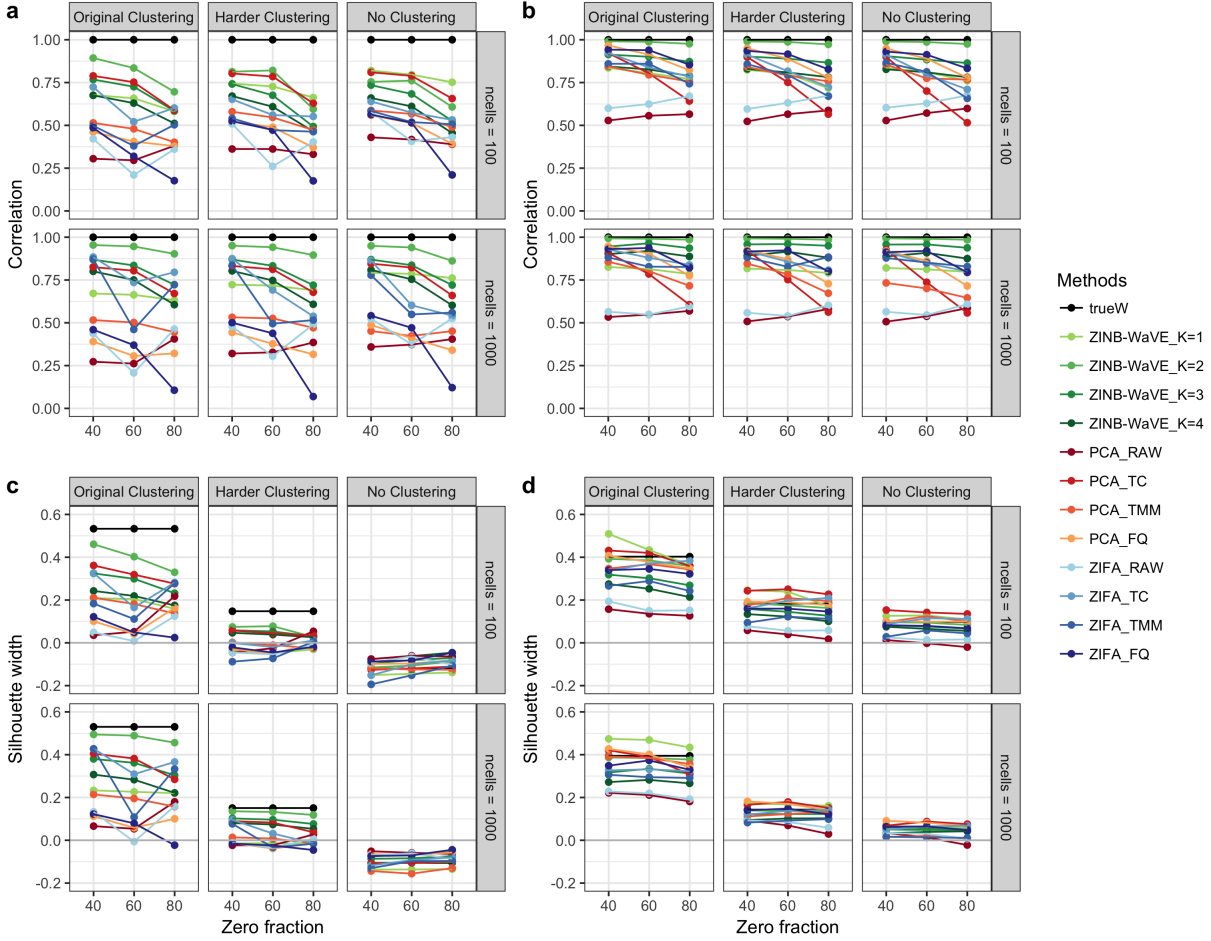

Supplementary Figure 28: *Between-sample distances and silhouette widths for ZINB-WaVE, PCA, and ZIFA: ZINB-WaVE simulation model.* (a) Correlation between between-sample distances based on true and estimated low-dimensional representations of the data for simulations based on the V1 dataset. (b) Same as (a) for simulations based on the S1/CA1 dataset. (c) Silhouette width for true clusters for simulations based on the V1 dataset. (d) Same as (c) for simulations based on the S1/CA1 dataset. As in Figure 7, all datasets were simulated from our ZINB-WaVE model with  $J = 1,000$  genes,  $K = 2$  unknown factors,  $X = \mathbf{1}_n$ , cell-level intercept ( $V = \mathbf{1}_J$ ), and genewise dispersion. Each point corresponds to a simulation scenario (zero fraction, clustering strength, sample size); correlations between true and estimated between-sample distances and silhouette widths are averaged over  $B = 10$  simulated datasets and  $n$  cells. Column panels show three different clustering scenarios, where the scaling of the ratio of within to between-cluster sums of squares  $b^2$  corresponds to the original clustering ( $b^2 = 1$ ), a harder clustering ( $b^2 = 5$ ), and no clustering ( $b^2 = 10$ ). Row panels correspond to different numbers of cells ( $n \in \{100, 1,000\}$ ). Between-sample distance matrices and silhouette widths were based on  $W$  for ZINB-WaVE, the first two principal components for PCA, and the first two latent variables for ZIFA. ZINB-WaVE was applied with  $X = \mathbf{1}_n$ ,  $V = \mathbf{1}_J$ , genewise dispersion, and  $K \in \{1, 2, 3, 4\}$ . For PCA and ZIFA, different normalization methods were used. Colors correspond to the different methods.

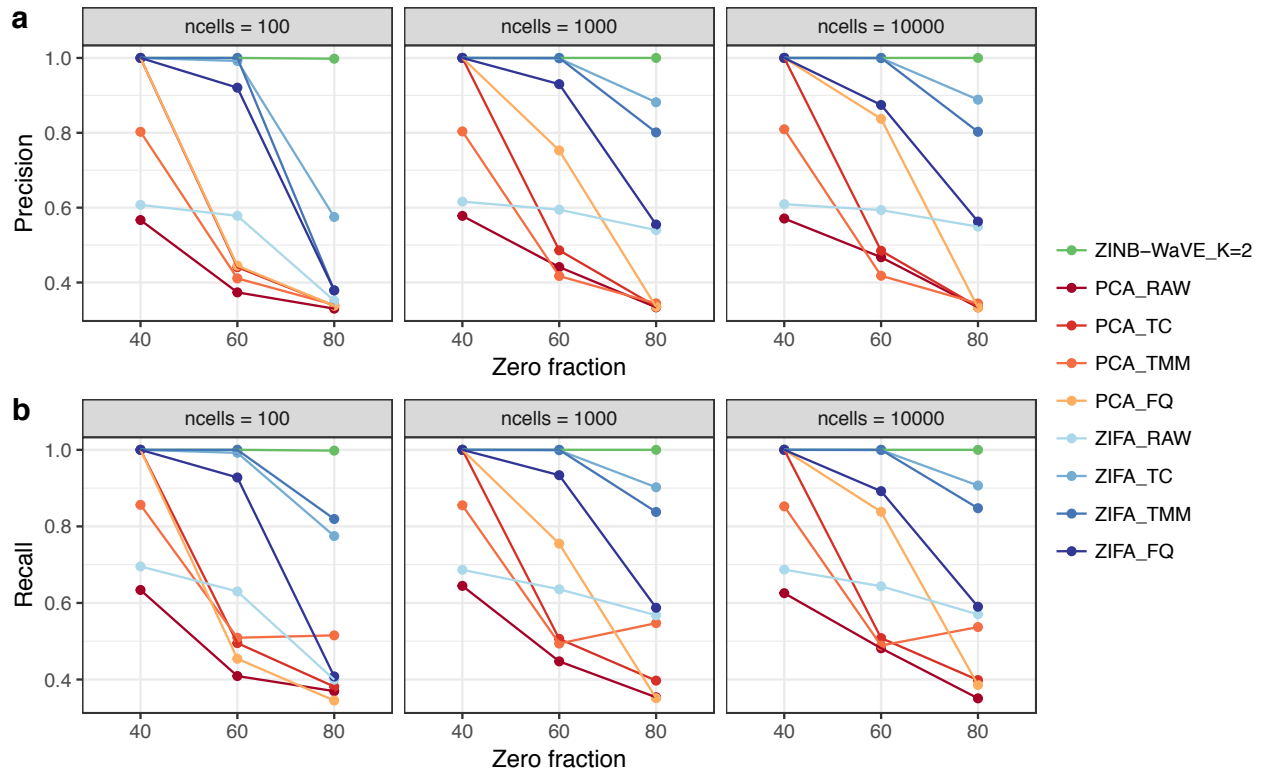

Supplementary Figure 29: *Precision and recall for ZINB-WaVE, PCA, and ZIFA: Lun & Marioni<sup>42</sup> simulation model.* Average (a) precision coefficient and (b) recall coefficient (over  $n$  samples and  $B = 10$  simulations) vs. zero fraction, for  $n \in \{100, 1,000, 10,000\}$  cells, for datasets simulated from the Lun & Marioni<sup>42</sup> model, with  $C = 3$  clusters and equal number of cells per cluster. Clustering was performed using  $k$ -means on  $W$  for ZINB-WaVE, the first two principal components for PCA, and the first two latent variables for ZIFA. ZINB-WaVE was applied with  $X = \mathbf{1}_n$ ,  $V = \mathbf{1}_J$ , genewise dispersion, and  $K = 2$ . For PCA and ZIFA, different normalization methods were used. Colors correspond to the different methods. While ZINB-WaVE has a recall and precision of one for all sample sizes  $n$  and zero fractions, the performance of PCA and ZIFA decreases with larger zero fraction. See Methods for details on clustering procedure and precision and recall coefficients.

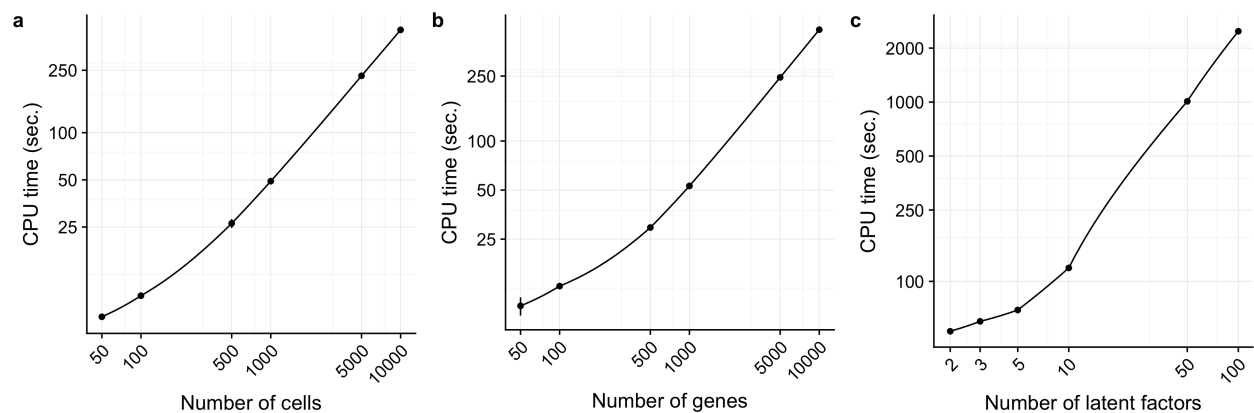

Supplementary Figure 30: *CPU time for ZINB-WaVE estimation procedure*. Log-log scatterplot of mean CPU time (in seconds) vs. **(a)** sample size  $n$ , **(b)** number of genes  $J$ , and **(c)** number of latent factors  $K$ . For each panel  $B = 10$  datasets were simulated from the Lun & Marioni<sup>42</sup> model with zero fraction of about 60%. The following specific values were used for each panel: **(a)**  $n \in \{50, 100, 500, 1,000, 5,000, 10,000\}$  cells,  $J = 1,000$  genes,  $K = 2$  latent factors; **(b)**  $J \in \{50, 100, 500, 1,000, 5,000, 10,000\}$  genes,  $n = 1,000$  cells,  $K = 2$  latent factors; **(c)**  $n = 1,000$  cells,  $J = 1,000$  genes, and  $K \in \{2, 3, 5, 10, 50, 100\}$  latent factors. The following values were used to fit the ZINB-WaVE model:  $X = \mathbf{1}_n$ , cell-level intercept ( $V = \mathbf{1}_J$ ), and common dispersion. CPU times were averaged over  $B = 10$  simulated datasets and standard deviations are indicated by the vertical bars. Computations were done with 7 cores on an iMac with eight 4 GHz Intel Core i7 CPUs and 32 GB of RAM.
